# Supplementary material
Source: PubMed Central journal article supplement (PMC3376212)
Supplement: NIHMS382187-supplement-1221472SupMaterials.pdf [file NIHMS382187-supplement-1221472SupMaterials.pdf]

# Supplementary Materials for

## **MORC family ATPases required for heterochromatin condensation and gene silencing**

Guillaume Moissiard<sup>1</sup>, Shawn J. Cokus<sup>1</sup>, Joshua Cary<sup>1</sup>, Suhua Feng<sup>1</sup>, Allison C. Billi<sup>2</sup>, Hume Stroud<sup>1</sup>, Dylan Husmann<sup>1</sup>, Ye Zhan<sup>3</sup>, Bryan R. Lajoie<sup>3</sup>, Rachel P. McCord<sup>3</sup>, Christopher J. Hale<sup>1</sup>, Wei Feng<sup>4</sup>, Scott D. Michaels<sup>4</sup>, Alison R. Frand<sup>5</sup>, Matteo Pellegrini<sup>1,6</sup>, Job Dekker<sup>3</sup>, John K. Kim<sup>2</sup>, and Steve Jacobsen<sup>1,5,6,7 \*</sup>

<sup>1</sup>Department of Molecular, Cell, and Developmental Biology, University of California at Los Angeles, Terasaki Life Sciences Building, 610 Charles Young Drive East, Los Angeles, California 90095-723905, USA.

<sup>2</sup>Life Sciences Institute and Department of Human Genetics, University of Michigan, Ann Arbor, Michigan, USA.

<sup>3</sup>Lazare Research Building 570N, Program in Systems Biology and Gene Function and Expression, University of Massachusetts Medical School, 364 Plantation Street, Worcester, MA, 01605, USA

<sup>4</sup>Department of Biology, Indiana University, Bloomington, Indiana, USA.

<sup>5</sup>Department of Biological Chemistry, David Geffen School of Medicine, University of California Los Angeles, Los Angeles, California, USA.

<sup>6</sup>Eli & Edythe Broad Center of Regenerative Medicine & Stem Cell Research, University of California Los Angeles, Los Angeles, California, USA.

<sup>7</sup>Howard Hughes Medical Institute, University of California Los Angeles, Los Angeles, California, USA.

\*Correspondence to: [jacobsen@ucla.edu](mailto:jacobsen@ucla.edu)

## Material and Methods:

### Plant material and growing conditions.

All mutants are in the Columbia (Col) ecotype. *atmorc6-3* (GK\_599B06) and *atmorc1-4* (SAIL\_1239\_C08) T-DNA lines were obtained from GABI-Kat (24) at University of Bielefeld, Germany and ABRC at Ohio State University, respectively. *drm2-2* (SALK\_150863.37.35) and *cmt3-11* (SALK\_148381) were previously described (4). T-DNA insertions were confirmed by PCR-based genotyping. Primer sequences are described in [Table S4](#). *Arabidopsis* plants were grown under continuous light.

### Cloning of *SDC::GFP*.

NLS-GFP-35S terminator was PCR amplified and cloned into pCambia3300. The *SDC* promoter corresponding to a region of ~2.4 kb upstream of *SDC* transcriptional start site was PCR amplified from wild type genomic DNA and cloned into pCR2.1 TOPO vector (Invitrogen). Quick change site-directed mutagenesis (Stratagene) was performed to create a polymorphism (NlaIII -> BamHI) within the *SDC* promoter, which was subsequently mobilized into pCambia3300 upstream of NLS-GFP sequence. *drm2 cmt3* double mutant plants were transformed with the *SDC::GFP* construct using the *Agrobacterium*-mediated floral dip method (25). Transgenic plants showing strong GFP fluorescence were backcrossed with a wild type plant to ensure proper silencing of *SDC::GFP* in the F<sub>1</sub> generation. F<sub>1</sub> plants were self-crossed and their progenies (F<sub>2</sub>) were screened for GFP fluorescence and PCR-based genotyped to obtain the following genetic backgrounds: *SDC::GFP* wt, *SDC::GFP drm2*, *SDC::GFP cmt3* and *SDC::GFP drm2 cmt3*. Primer sequences used for *SDC::GFP* cloning are described in [Table S4](#).

### Cloning of *pAtMORC1::AtMORC1-Myc* and *pAtMORC6::AtMORC6-Myc*.

*AtMORC1* and *AtMORC6* genomic regions were PCR amplified and the Myc epitope was added to the C-terminus of each protein as previously described (26). In both cases, the amplified region includes a ~1Kb promoter sequence upstream of the respective transcriptional start site. Primer sequences are described in [Table S4](#).

### **EMS mutagenesis, GFP screening and mapping analyses.**

Two thousand seeds from *SDC::GFP* wt and *SDC::GFP cmt3* lines were mutagenized in 0.3% EMS solution for 13 hours with rotation. Seeds were subsequently washed with water and planted onto soil. For each background, approximately one thousand M2 populations were collected and subsequently screened for GFP fluorescence under UV light using a Leica MZ16F Fluorescence Stereomicroscope coupled with the GPF Plus fluorescence filter. Pictures were taken using the DFC300 FX digital camera kit. Mapping and identification of the three EMS mutations responsible for the phenotypes were performed by bulk segregant analysis coupled with deep genome re-sequencing as previously described (27), using single nucleotide polymorphisms (SNPs) between the Landsberg (*Ler*) and Col ecotypes derived *de novo* from data from a large number of mapping crosses.

### **Western Blotting.**

Western blots against GFP were performed using the GFP-specific antibody (Invitrogen, AA1122). Western blots against Myc were performed as previously described (26).

### **RNA analyses.**

Total RNAs were extracted from two-week-old seedlings using Trizol (Ambion RNA technology). Two µg of total RNAs were subsequently used to generate libraries for High Throughput RNA sequencing (TruSeq RNA, Illumina) per manufacturer instruction. For RNA-seq analyses, sequencing reads were mapped with Bowtie (28) allowing up to 2 mismatches. Gene and transposon expression was measured by calculating reads per kilobase per million mapped reads (RPKM) (29). *p*-values were calculated using Fisher's exact test and Benjamini corrected for multiple testing (30). Differentially expressed elements in wild type and mutants were defined by applying  $\log_2(\text{mutant} / \text{wild type}) > 2$  and  $P < 0.05$  cutoffs. For quantitative PCR analysis, total RNAs were converted into cDNA using SuperScript III Reverse Transcriptase (Invitrogen) per manufacturer instructions. Quantitative PCR was carried out using SyBr Green PCR mastermix (Roche) and gene- or transposon-specific primers (see Table S4) on a Stratagene Mx real-time thermocycler.

### **DNA methylation analyses.**

Whole genome BS-seq libraries were performed as previously described (9), except directly with pre-methylated final adapters. BS-seq data was mapped with BS seeker as previously described (31). For traditional bisulfite sequencing, genomic DNA extracted from two-week-old seedlings was bisulfite converted using MethylEasy (Human Genetic Signature) and processed as previously described (5). Primer sequences used for bisulfite sequencing are described in [Table S4](#). Southern blot was performed as previously described (2).

### **H3K9me2 ChIP-seq analyses.**

Two grams of 3-week-old seedlings were crosslinked with formaldehyde and chromatin-IP experiments were performed as previously described (32). A mouse monoclonal antibody was used for H3K9me2 immunoprecipitation (Abcam ab1220). ChIP-seq library was generated per manufacturer instructions (Illumina). Demultiplexed (by exact match to canonical 6-mers) single end 50-mer HiSeq PF-passing reads were aligned to the TAIR8 reference genome using Bowtie 1, keeping all hits with at most two or fewer mismatches in the first 28 cycles and with total sum of Phred quality scores at mismatches up to 100, further filtered to only keep reads with a unique hit of fewest total mismatches, retaining only that unique hit. Reads were extended downstream to total length 220 nucleotides to reflect nominal library fragment lengths and single-stranded per-base pair coverage tallied, normalized by total nuclear chromosome coverage to account for variation in sequencing depth.

### **siRNA analyses.**

Total RNAs were extracted from flowers using Trizol (Ambion RNA technology) and siRNAs were purified as previously described (33) with the following modifications. Polyacrylamide gel-excised siRNAs were eluted in 0.3M NaCl overnight at 4°C. Gel debris were filtered using 5µm Filter tubes (IST Engineering Inc) and, ethanol-precipitated siRNAs were resuspended in 5ul of nuclease-free H<sub>2</sub>O to subsequently generate libraries for High Throughput small RNA sequencing (TruSeq small RNA, Illumina) per manufacturer instruction. Small RNA libraries were Illumina sequenced to 50bp length, and resulting reads were trimmed for adapter sequences and then aligned to the TAIR8 genome using Bowtie (28).

### **Hi-C analyses.**

Two grams of 3-week-old seedling leaves were crosslinked with formaldehyde as previously described (32). Hi-C experiments were performed as previously described (34), with the exception that plant nuclei were prepared following a previously published *Arabidopsis* ChIP protocol (32). Hi-C libraries were sequenced on a HiSeq 2000 sequencer (Illumina) obtaining paired end 50+50 nucleotide reads. Sequencing reads were mapped to the TAIR8 *A. thaliana* reference genome using Bowtie 1 to obtain all zero-mismatch hits of ends independently and keeping only paired end read pairs with each end having exactly one hit, obtaining 21,379,391 wild type and 14,815,038 *atmorc6-1* pairs. Paired reads with ends aligning to the same HindIII fragment were discarded. Hi-C interaction counts were summed within disjoint symmetric 2-D bins 200 kilobase pairs tiling the genome. HindIII fragments which overlapped regions of poor reference genome quality were excluded from the analysis. Genomic 1-D bins (rows and columns) in which > 50% of the sequence length was excluded by these filters were treated as missing data, excluded from further analyses, and appear in figures as empty regions. The “raw” coverage of each genomic 2-D bin was taken as the number of paired end reads lying in that bin. Whole genomic 1-D bins with a total coverage more than 3 standard deviations greater than or less than the mean were excluded and then the matrix of interactions was corrected for 1-D bin coverage variation as previously described (34) using 50 iterations of that procedure. The comparison between the wild type and *atmorc6-1* mutant was expressed as the difference divided by the mean within each bin with smoothing plus or minus one bin.

### **Immunofluorescence.**

Immunofluorescence experiments examining chromocenter condensation were performed as previously described (35) with the following modifications. Leaves from three-week-old plants were fixed in 4% paraformaldehyde in TRIS buffer (10mM TRIS pH 7.5, 10mM EDTA, 100mM NaCl) for 20 minutes and washed twice in TRIS buffer. Leaves were chopped in 400 microliters lysis buffer (15mM TRIS pH 7.5, 2mM EDTA, 0.5mM spermine, 80mM KCl, 20mM NaCl, 0.1% Triton X-100) and filtered through a 35 micron cell strainer. Five microliters of nuclei suspension was added to sorting buffer (100mM TRIS pH 7.5, 50mM KCl, 2mM MgCl<sub>2</sub>, .05% Tween-20, 20.5% sucrose) and air dried on microscope slides for two hours and then

post-fixed in 4% paraformaldehyde in PBS for 20 minutes. Slides were washed three times in PBS and incubated in blocking buffer (3% BSA, 10% horse serum in PBS) for 30 minutes at 37°C. Nuclei were incubated at 4°C overnight in mouse monoclonal antibody against H3K9me2 (Abcam ab1220; 1:200). Slides were washed in PBS and incubated with goat anti-mouse FITC antibody (Abcam ab7064; 1:200) for 90 minutes at room temperature. Following PBS washes, nuclei were counterstained and mounted in Vectashield mounting media with DAPI (Vector H-1200). Nuclei were analyzed with a Zeiss Axio Imager Z1 microscope at 100X magnification and images were captured with a Hamamatsu ORCA-ER Camera. For detection of Myc epitope tagged proteins, nuclei were isolated as above. Following preparation of nuclei suspension, nuclei were spun down for 2 minutes at 2,000rpm and resuspended in PBS. Blocking and antibody incubations were performed in suspension, followed by pellet washing with PBS. Myc epitope was detected with mouse monoclonal antibody (Abcam 9E10; 1:200) and goat anti-mouse FITC (abcam ab7064; 1:200). Two microliters of prepared nuclei were mounted in Vectashield media. Nuclei were analyzed with the Applied Precision DeltaVision DV Live Cell Imaging System using Olympus IX-71 Customized Inverted Microscope and Photometrics CoolSNAP HQ2 CCD Camera (Figure 3). Additional images of nuclei were taken using a Zeiss LSM 510 META confocal microscope with Axiocam camera (Figure S15).

### **RNA interference in *C. elegans*.**

RNAi experiments were carried out as reported previously (36) using the *eri-1(mg366); [wIs54(scm::gfp)]* strain, which shows increased sensitivity to RNAi. Briefly, bacterial strains carrying plasmids expressing double-stranded RNA targeting *morc-1* or *rde-4* were obtained from the Ahringer RNAi library (37). Hatched L1 *eri-1(mg366); [wIs54(scm::gfp)]* larvae were cultured on empty vector (L4440), *morc-1*, or *rde-4* RNAi bacteria for two generations at 22.5°C. Images of F<sub>1</sub> L4 larvae were captured on an Olympus BX61 epifluorescence compound microscope with a Hamamatsu ORCA ER camera using Slidebook 4.0.1 digital microscopy software (Intelligent Imaging Innovations) and processed using ImageJ.

## Supplementary Figures:

**Fig. S1.** (A) Schematic representation of the *SDC::GFP* construct. The *SDC* promoter carries seven tandem repeats (black arrows) targeted by DNA methylation. The red bar corresponds to the *Simian Virus 40 (SV40)* Nuclear Localization Signal fused to GFP. (B) Schematic of AtMORC1 and AtMORC6 proteins showing the GHKL and S5 ATPase domains together with putative Coiled-Coil (CC) domains. The location of nonsense mutations within the protein sequences is shown for each EMS allele. aa; amino acid. Based on contextual associations of prokaryotic and eukaryotic MORC family members with associated domains, as well as with genes in operons, eukaryotic MORCs were predicted to have originated from bacterial restriction modification systems, and in eukaryotes have been proposed to remodel chromatin superstructure in response to epigenetic signals such as histone and DNA methylation (12). For instance, topoisomerases and MutL (a factor involved in methylated DNA directed mismatch repair) proteins use ATP hydrolysis to mediate large movements and looping of DNA. Similar to other GHKL ATPases (38), MORC3 in mouse was shown to act as a molecular clamp, interacting with itself constitutively through its coiled-coil domain, and also interacting via its ATPase domain in an ATP-dependent manner (39). In this way, MORC protein architectures are also reminiscent of the structural maintenance of chromosomes (SMC) family of proteins, which control chromosome condensation and cohesion (40). In addition, a very distant class of ATPase homologs contain the GHKL domain fused with the hinge and coiled coil domains of SMC-like ATPases (12) one of which, SmcHD1, is required for maintenance of X chromosome inactivation in mouse (41). Interestingly, in *Arabidopsis*, the protein DMS3/IDN1, which contains an SMC-like Hinge domain,

has also been involved in gene silencing (42, 43) and GMI1, which is a GHKL protein carrying a Hinge domain has recently been involved in DNA repair (44).

**Fig. S2.** Mapping of *cmt3* #7, wt #67 and *cmt3* #49 mutations by bulk segregant analysis coupled with whole genome re-sequencing (27). **(A to C)** Depletion in percentage of Landsberg (*Ler*) single nucleotide polymorphisms (SNPs), defining the linkage interval for the population *cmt3* #7 (chromosome 4 at ~17-18 megabases) (A), and defining the linkage intervals for the populations wt #67 (B) and *cmt3* #49 (C) (chromosome 1 at ~6-7 megabases). Red arrows mark the linkage intervals.

**Fig. S3.** Characterization of *atmorc1* and *atmorc6* EMS and T-DNA mutant alleles. **(A)** Location of EMS point mutations in *atmorc1-3*, *atmorc6-1*, and *atmorc6-2* alleles confirmed by traditional DNA sequencing. *AtMORC1* and *AtMORC6* reference sequences are shown for comparison. bp, base pair. **(B)** Gene structures of *AtMORC1* and *AtMORC6* showing exons (E, dark gray boxes) and introns (gray lanes). Light gray boxes correspond to 5' and 3' untranslated regions. The locations of EMS point mutations and T-DNA insertions are described above the gene structures. **(C and D)** Relative *AtMORC1* and *AtMORC6* RNA levels (C), and *SDC* RNA level (D) in *atmorc1-4* and *atmorc6-3* over wild type assayed by RT-qPCR and normalized to *ACTIN7*. Errors bars indicate standard deviation based on three independent biological replicates. Red arrows shown in (B) correspond to the primer locations within *AtMORC1* and *AtMORC6* mRNAs used in (C). **(E)** Genetic complementation tests and backcrosses showing that wt #67, *cmt3* #49, and *atmorc6-3* are three recessive allelic mutations in *AtMORC6* (top panels), while *cmt3* #7 and *atmorc1-4*

are two recessive allelic mutations in *AtMORC1* (two bottom left panels). The cross between wt #67 and *cmt3* #7 confirms that these two mutations are non-allelic (bottom right panel). Pictures represent leaves from F<sub>1</sub> plants observed under UV light for GFP fluorescence.

**Fig. S4.** Similar sets of TEs and protein-coding genes are upregulated in *atmorc1* and *atmorc6*. (A) Relative fold increase of *SDC* and four TE transcripts in *atmorc6-1*, *cmt3-11* and *cmt3-11 atmorc1-3* over wild type assayed by RT-qPCR and normalized to *ACTIN7*. Errors bars indicate standard deviation based on three independent biological replicates. (B-D) Venn diagrams showing overlap of upregulated TEs (B), upregulated protein-coding genes (C), and upregulated protein-coding genes associated with DNA methylation (D) in *atmorc1* and *atmorc6*. These analyses include the genes that were 4-fold up-regulated in RNA-seq experiments in both the EMS and T-DNA alleles. (E) Gene ontology (GO) analyses of genes upregulated in *atmorc1* and *atmorc6* showing no significant over-representation of any GO category in both *MORC* mutants. GO *p*-values are shown in parenthesis.

**Fig. S5.** DNA methylation at all protein-coding genes and transposons is not altered in *atmorc1* and *atmorc6*. (A and B) Metaplot analyses showing DNA methylation percent within protein-coding genes (A) and transposons (B) in *atmorc1-4*, *atmorc6-3* and wild type plants. The gray vertical lines mark the boundaries between 1 kilobase (Kb) upstream regions and gene bodies or transposons (left), and between gene bodies or transposons and 1Kb downstream regions (right).

**Fig. S6.** H3K9me2 is not altered in *atmorc1* and *atmorc6*. (A) log<sub>2</sub> ratios of H3K9me2/H3 in *atmorc1-4* and *atmorc6-3* over wild type do not show H3K9me2 changes in *atmorc6* or *atmorc1* mutants at the *SDC* promoter region. The H3K9me2/H3 wild type ratio is shown over the *SDC* promoter region in which H3K9me2 is enriched. RNA-seq reads in the different genetic backgrounds are shown to define the *SDC* transcribed region. (B) Metaplot analyses showing log<sub>2</sub> ratios of H3K9me2/H3 in *atmorc1-4* and *atmorc6-3* over wild type at the set of transposable elements and DNA-methylated genes that are upregulated in *atmorc1-4* and *atmorc6-3*. The gray vertical lines mark the boundaries between 1 kilobase upstream regions and transposons/PCGs (left) and between transposons/PCGs and 1 kilobase downstream regions (right). PCGs, Protein-coding genes.

**Fig. S7.** Small RNA accumulation is unaltered in *atmorc1* and *atmorc6*. Metaplot analyses showing no difference in the level of siRNAs in *atmorc1-4* and *atmorc6-3* compared to wild type at the set of transposable elements that are upregulated in *atmorc1-4* and *atmorc6-3*. The gray vertical lines mark the boundaries between 2 kilobases upstream regions and transposons (left) and between transposons and 2 kilobases downstream regions (right). Data is illustrated for different size classes of small RNAs.

**Fig. S8.** AtMORC1 and AtMORC6 are required for chromocenter condensation. Percentage of nuclei showing decondensed, partially decondensed (intermediate) and wild type chromocenters in *atmorc6-1*, *cmt3-11 atmorc1-3* and in *atmorc1-3 atmorc6-1* double mutants in comparison to control backgrounds after immunostaining of

nuclei using an antibody against H3K9me2. Pictures on top panels show examples of the three different patterns of chromocenters.

**Fig. S9.** H3K9me2 and DAPI staining show similar chromocenter condensation patterns in nuclei defined in Fig. S8 as nuclei showing wild type, intermediate or decondensed chromocenters in *cmt3-11 atmorc1-3*.

**Fig. S10.** H3K9me2 and DAPI staining show similar chromocenter condensation patterns in nuclei defined in Fig. S8 as nuclei showing wild type, intermediate or decondensed chromocenters in *atmorc6-1*.

**Fig. S11.** H3K9me2 and DAPI staining show similar chromocenter condensation patterns in nuclei defined in Fig. S8 as nuclei showing wild type, intermediate or decondensed chromocenters in *atmorc1-3 atmorc6-1*.

**Fig. S12.** Loci upregulated in *atmorc1* and *atmorc6* mostly localize to pericentromeric regions. Chromosomal views showing the log<sub>2</sub> ratios (*atmorc6-3*/wild type and *atmorc1-4*/wild type) of RNA sequencing reads in 100 Kb bins. The two red bars on each chromosome delimit the pericentromeric region with white circles representing the centromeres.

**Fig. S13.** Interaction matrix of the *atmorc6-1* genome from Hi-C analysis. Positions along the 5 chromosomes are shown from left to right and top to bottom, and each pixel represents interactions from uniquely mapping paired end reads in 200 kilobase bins. Black bars and circles mark the positions of the pericentromeric and telomeric

regions, respectively. Light grey regions represent areas masked out due to problematic mapping. Black bars show separation between chromosomes.

**Fig. S14.** Myc tagged AtMORC1 and AtMORC6 complement the EMS mutant lines.

(A) Western blot using an antibody against Myc confirms that pAtMORC1::AtMORC1-Myc and pAtMORC6::AtMORC6-Myc are expressed in transformed plants but not in untransformed control. (B) Similar analyses using an antibody against GFP show that lines expressing AtMORC1-Myc and AtMORC6-Myc do not express the *SDC::GFP* transgene, confirming that pAtMORC1::AtMORC1-Myc and pAtMORC6::AtMORC6-Myc proteins are functional. *cmt3-11 atmorc1-3* and *atmorc6-1* mutants are used as GFP positive controls for AtMORC1-Myc and AtMORC6-Myc complementation, respectively. Coomassie staining of the large Rubisco subunit (*rbcL*) is used as loading control.

**Fig. S15.** AtMORC6 bodies are adjacent to chromocenters. Additional images of nuclei expressing AtMORC6-Myc were obtained using a Zeiss LSM 510 META confocal microscope. Eight images are displayed, taken at depth intervals of 1 micron. Multiple chromocenters are bordered by AtMORC6 bodies.

Fig. S1

A

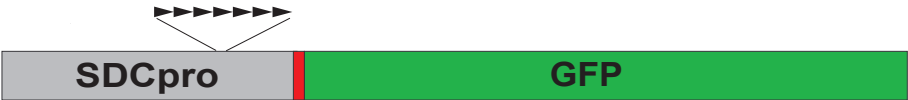

B

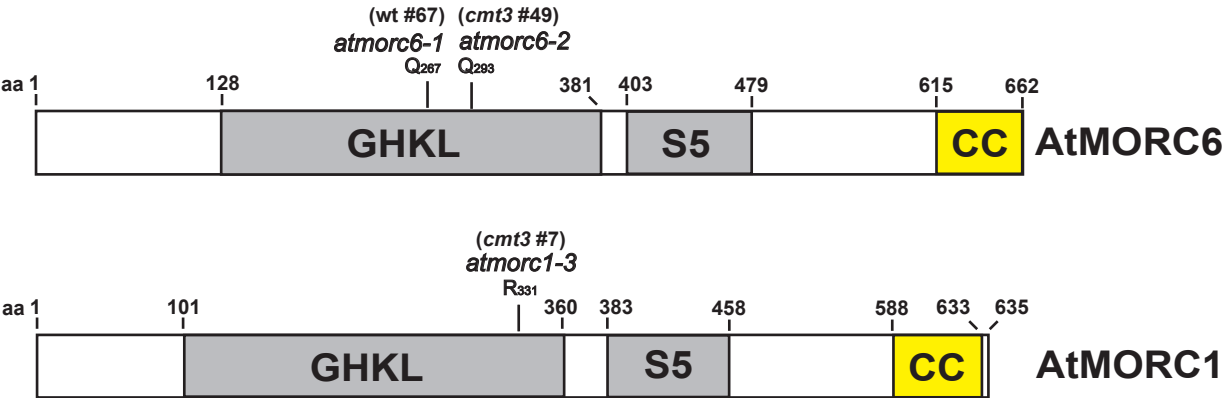

**Fig. S2**

**A**

***cmt3* #7 (*atmorc1-3*)**

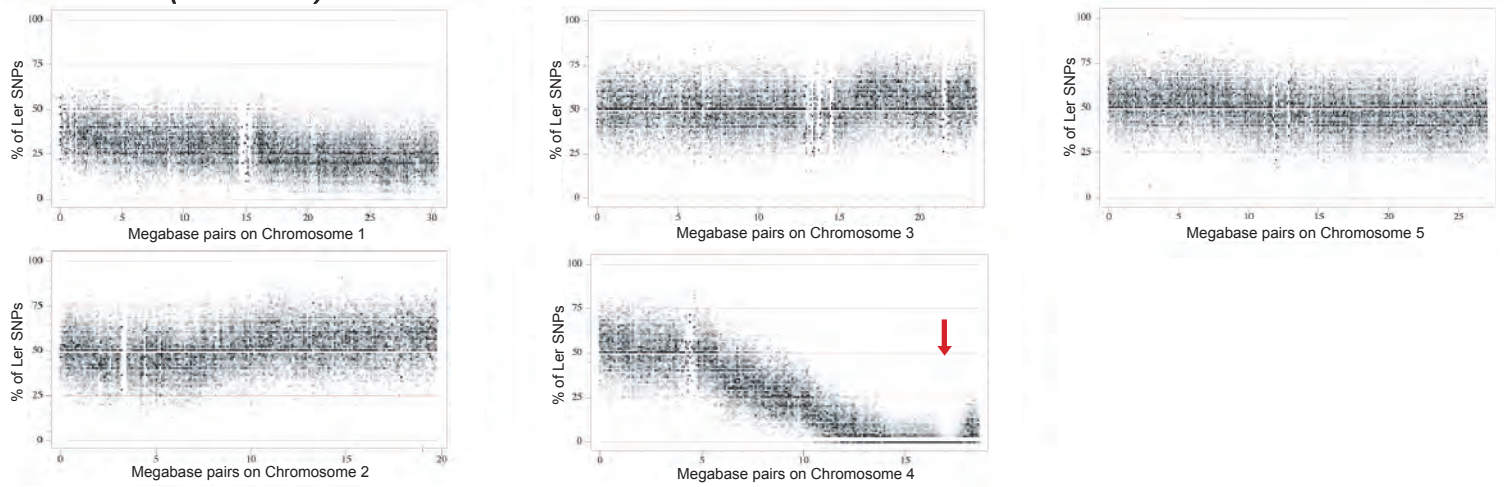

**B**

**wt #67 (*atmorc6-1*)**

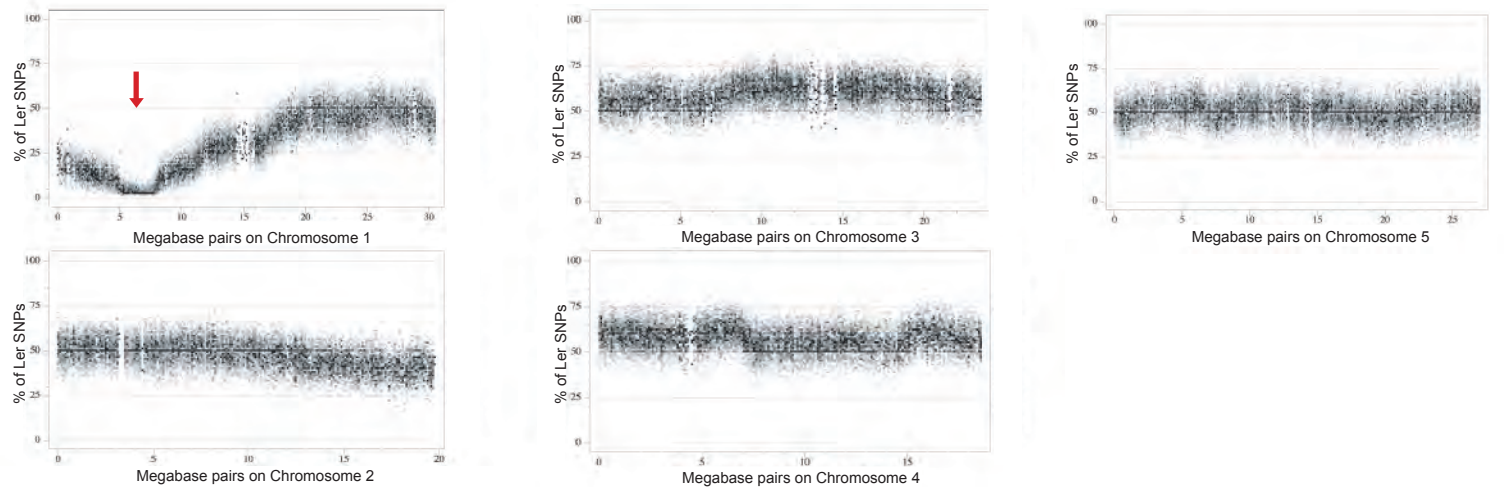

**C**

***cmt3* #49 (*atmorc6-2*)**

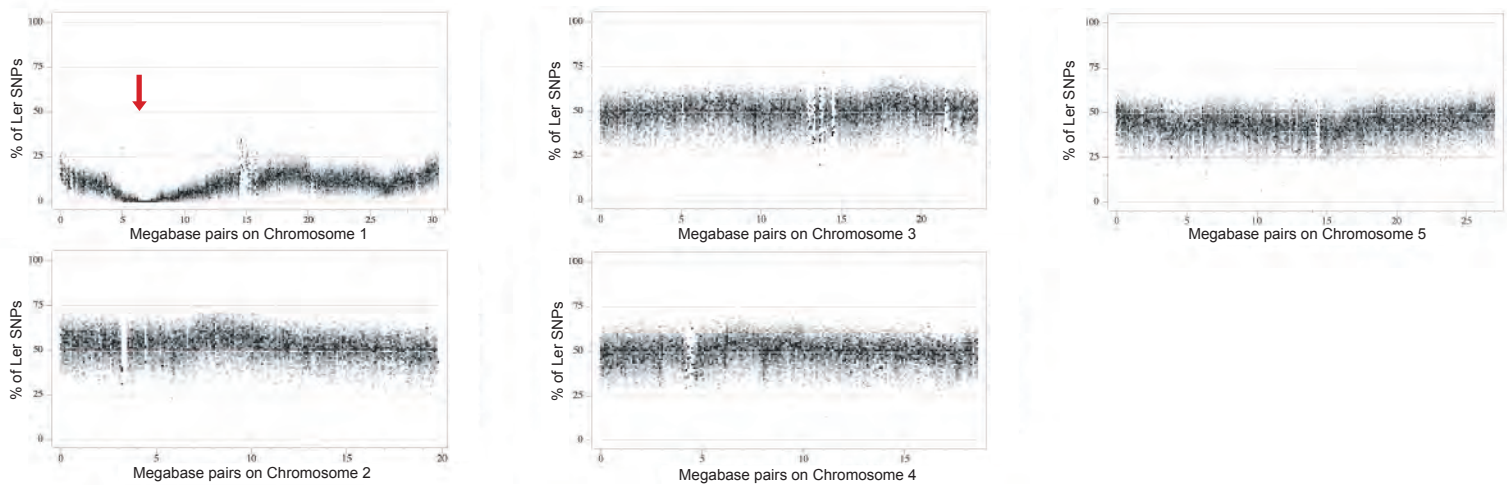

**A**

# B

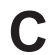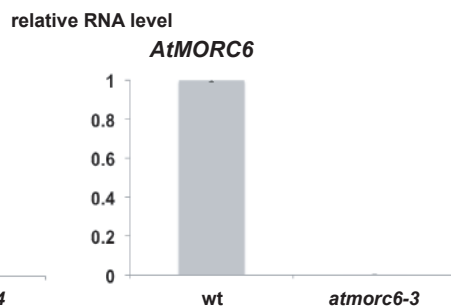

D

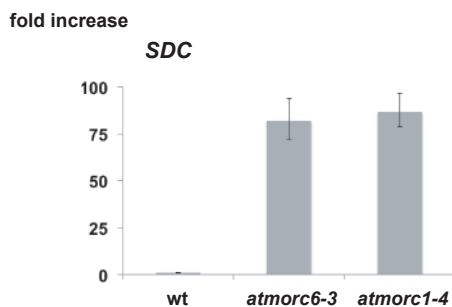

# E

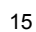

Fig. S4

A

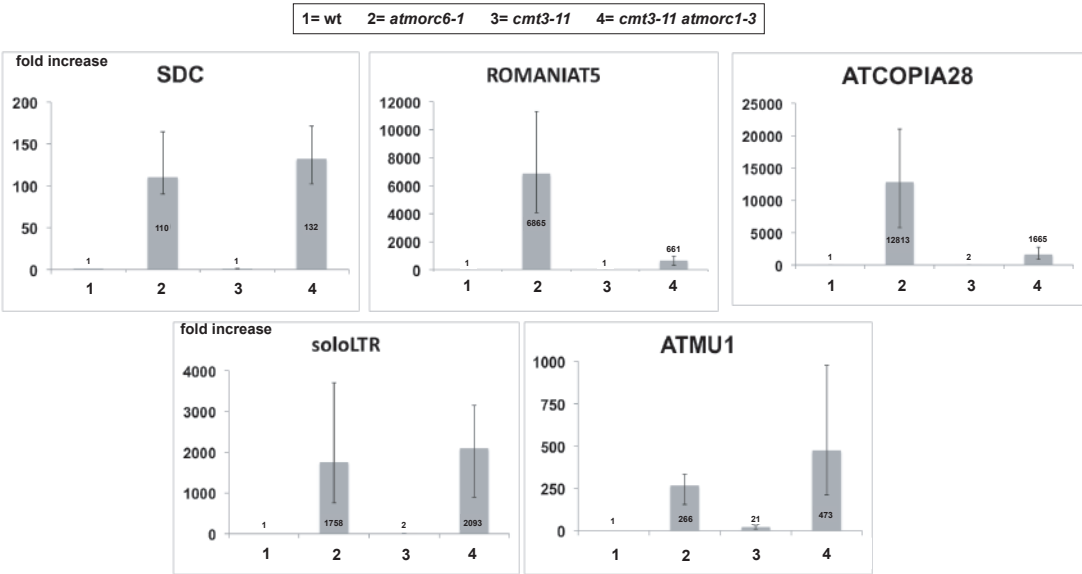

B

Transposable Elements

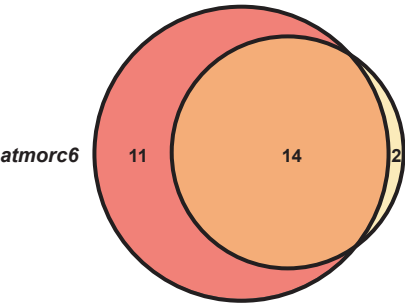

C

Protein coding Genes

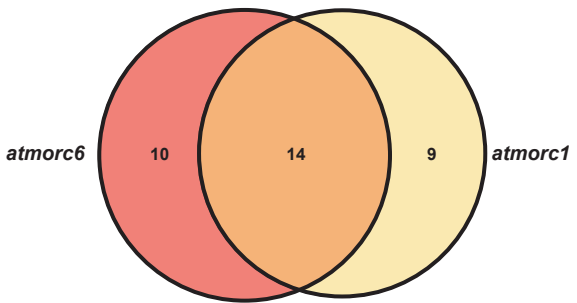

D

DNA-Methylated Protein coding Genes

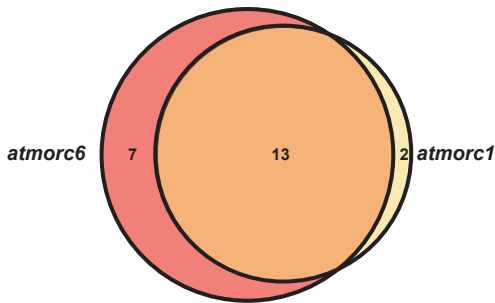

E

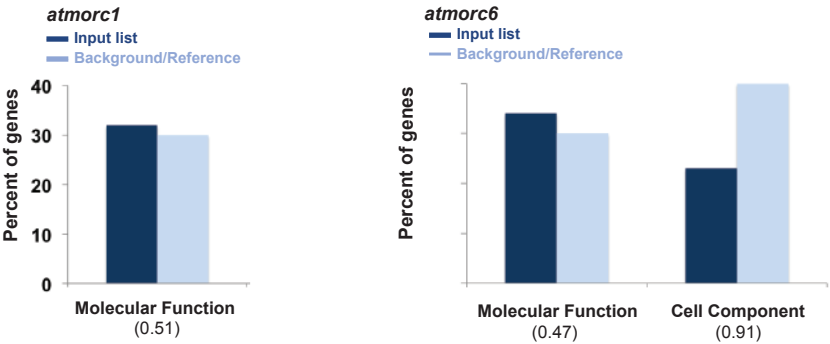

Fig. S5

A

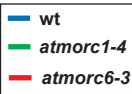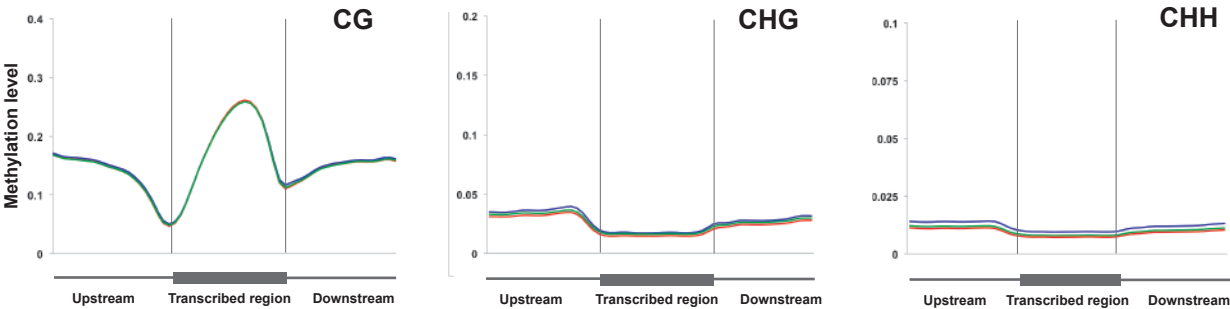

B

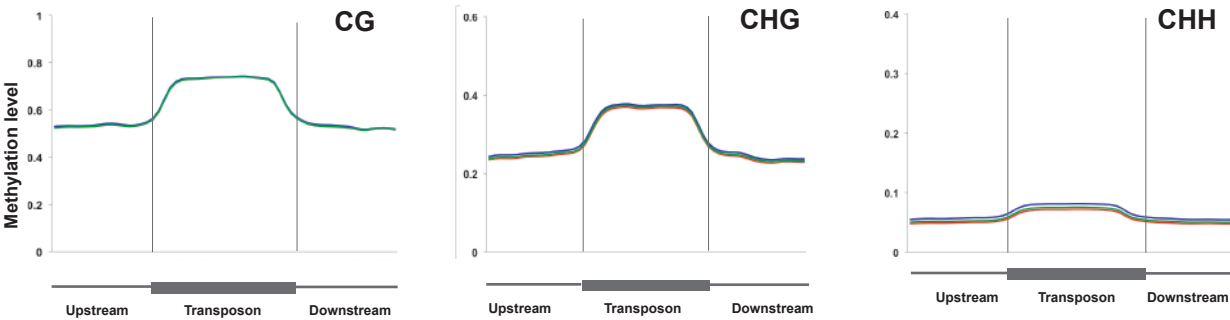

Fig. S6

A

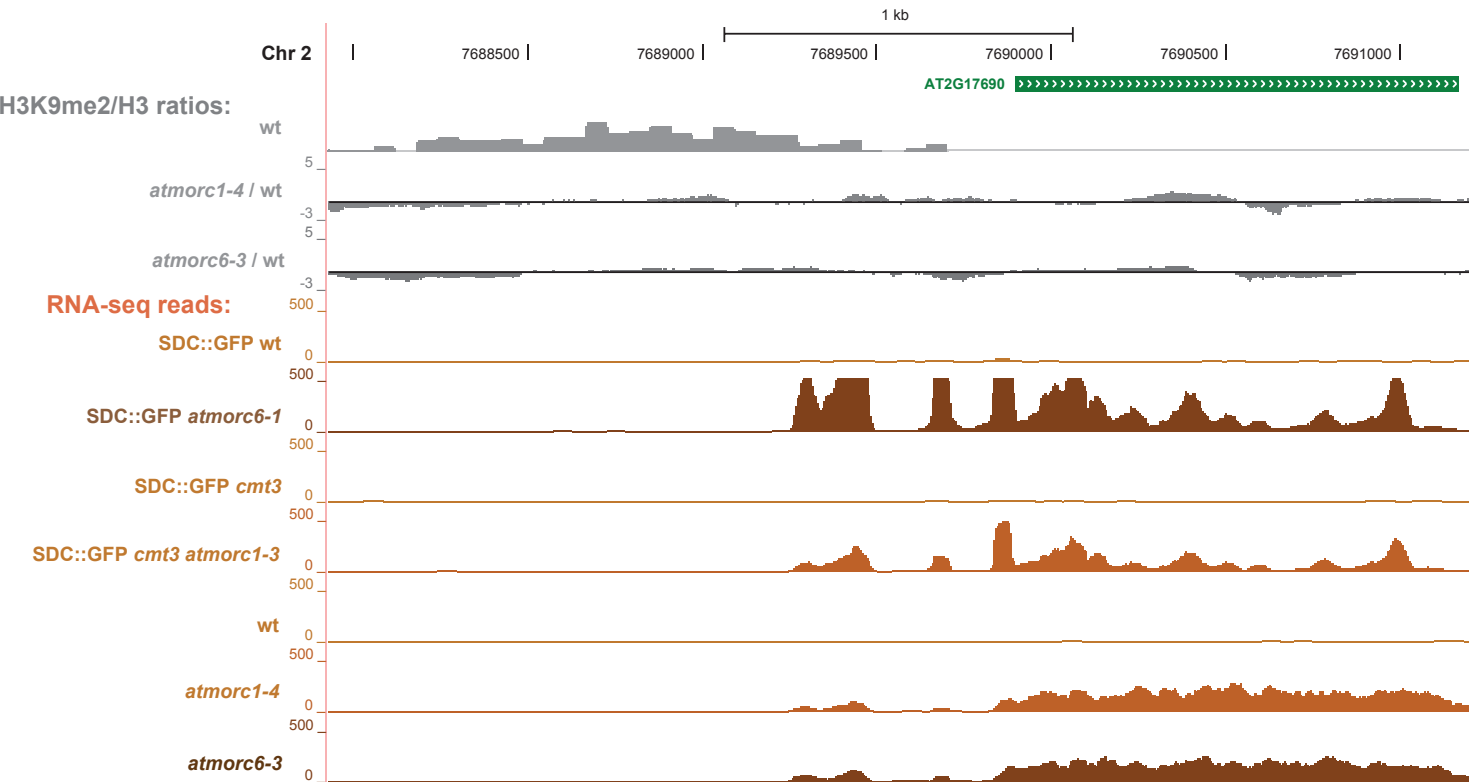

B

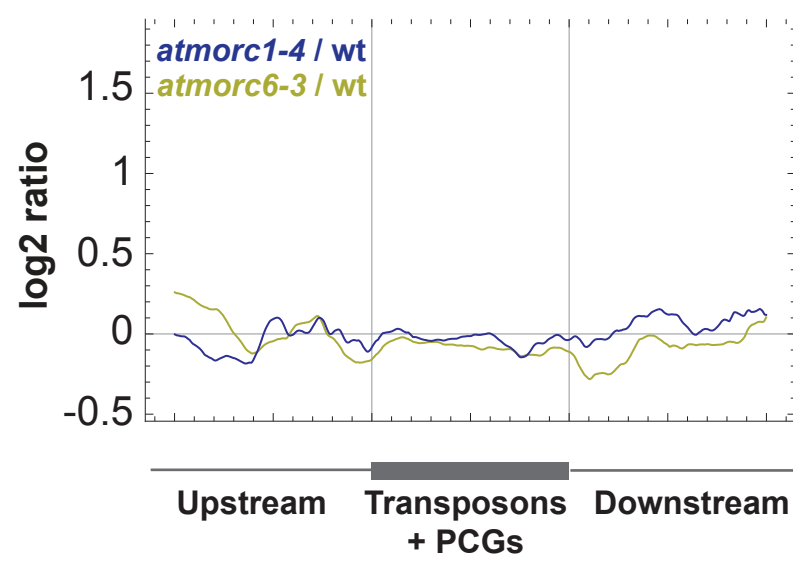

Fig. S7

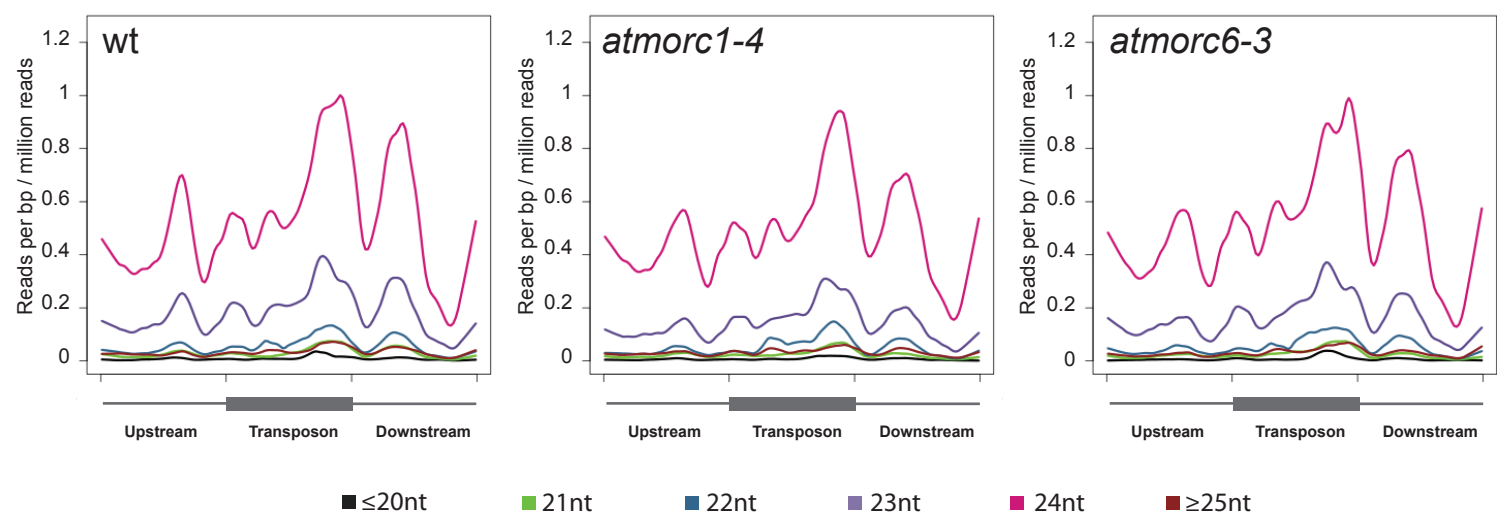

**Fig. S8**

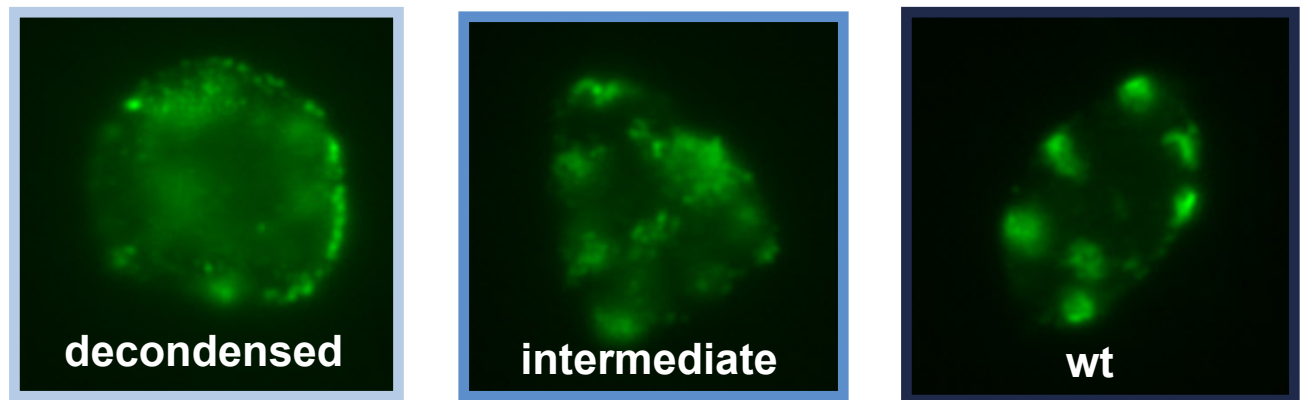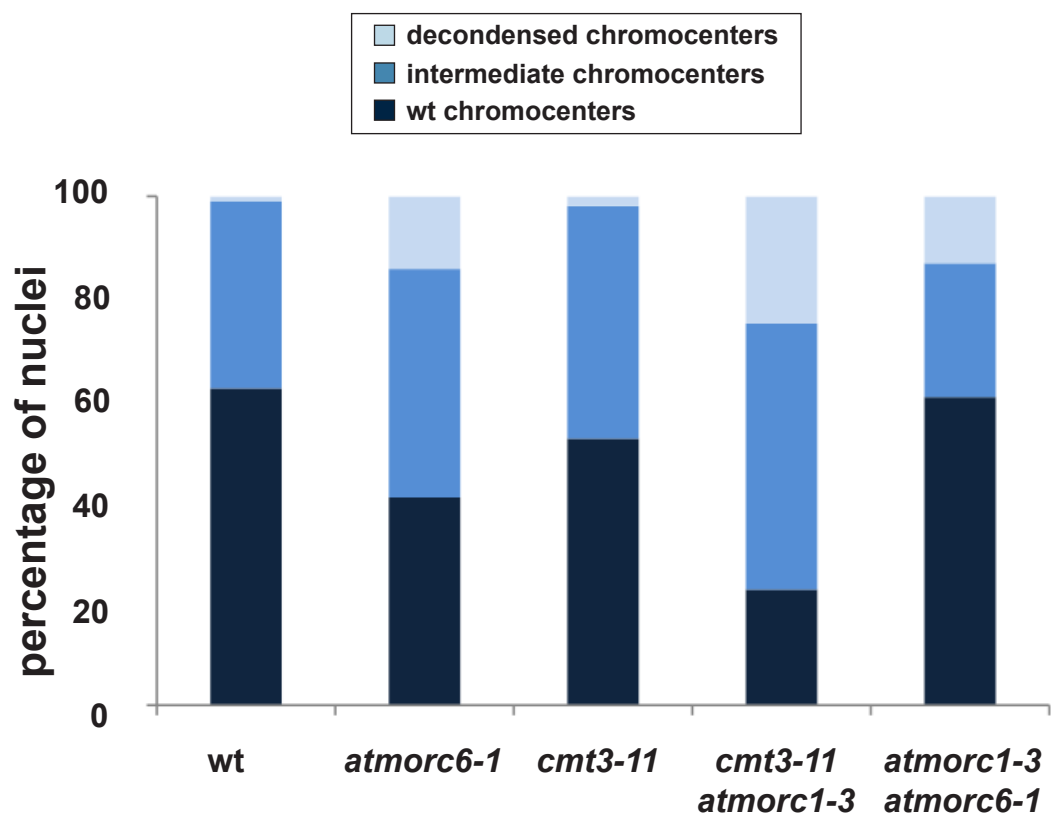

**Fig. S9**

*cmt3-11 atmorc1-3*

wild type

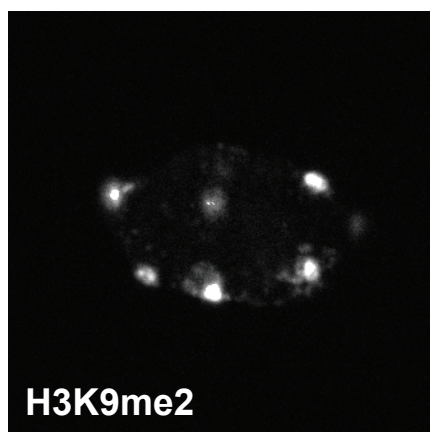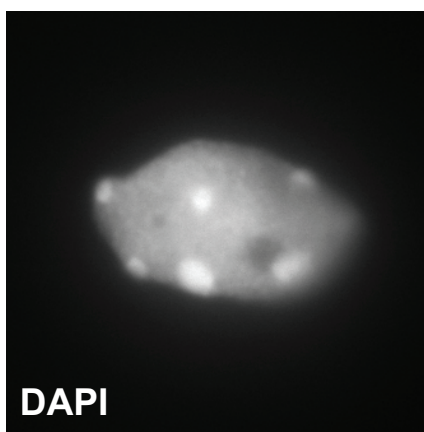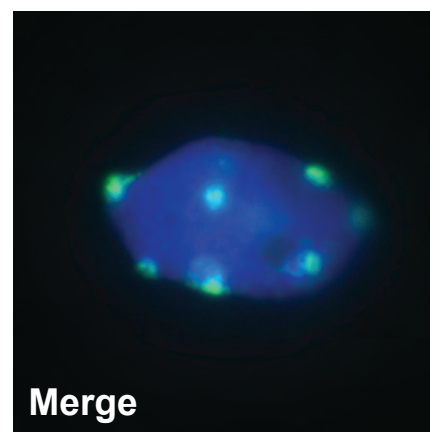

intermediate

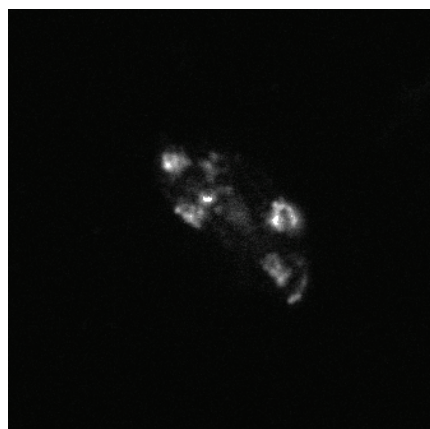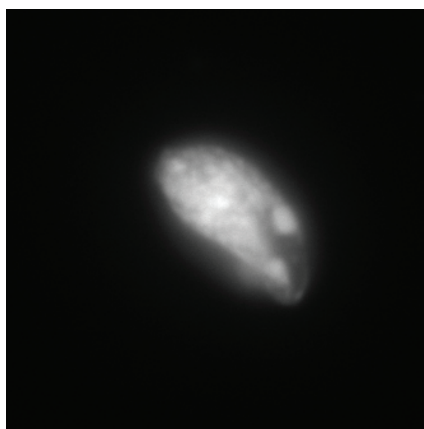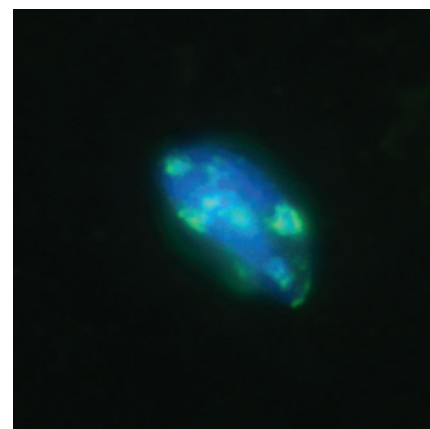

decondensed

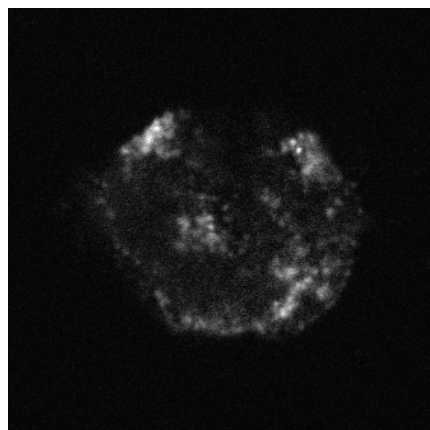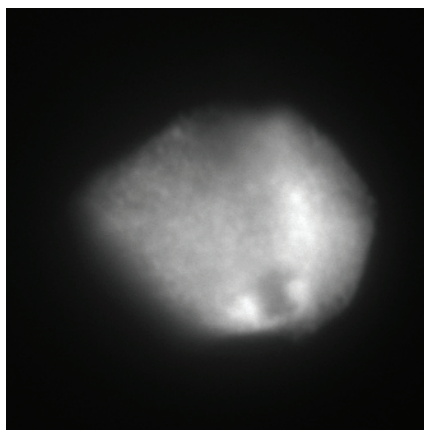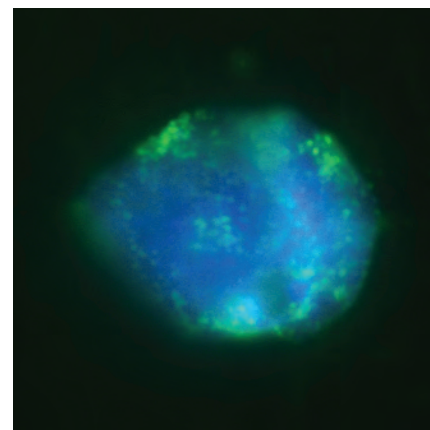

Fig. S10

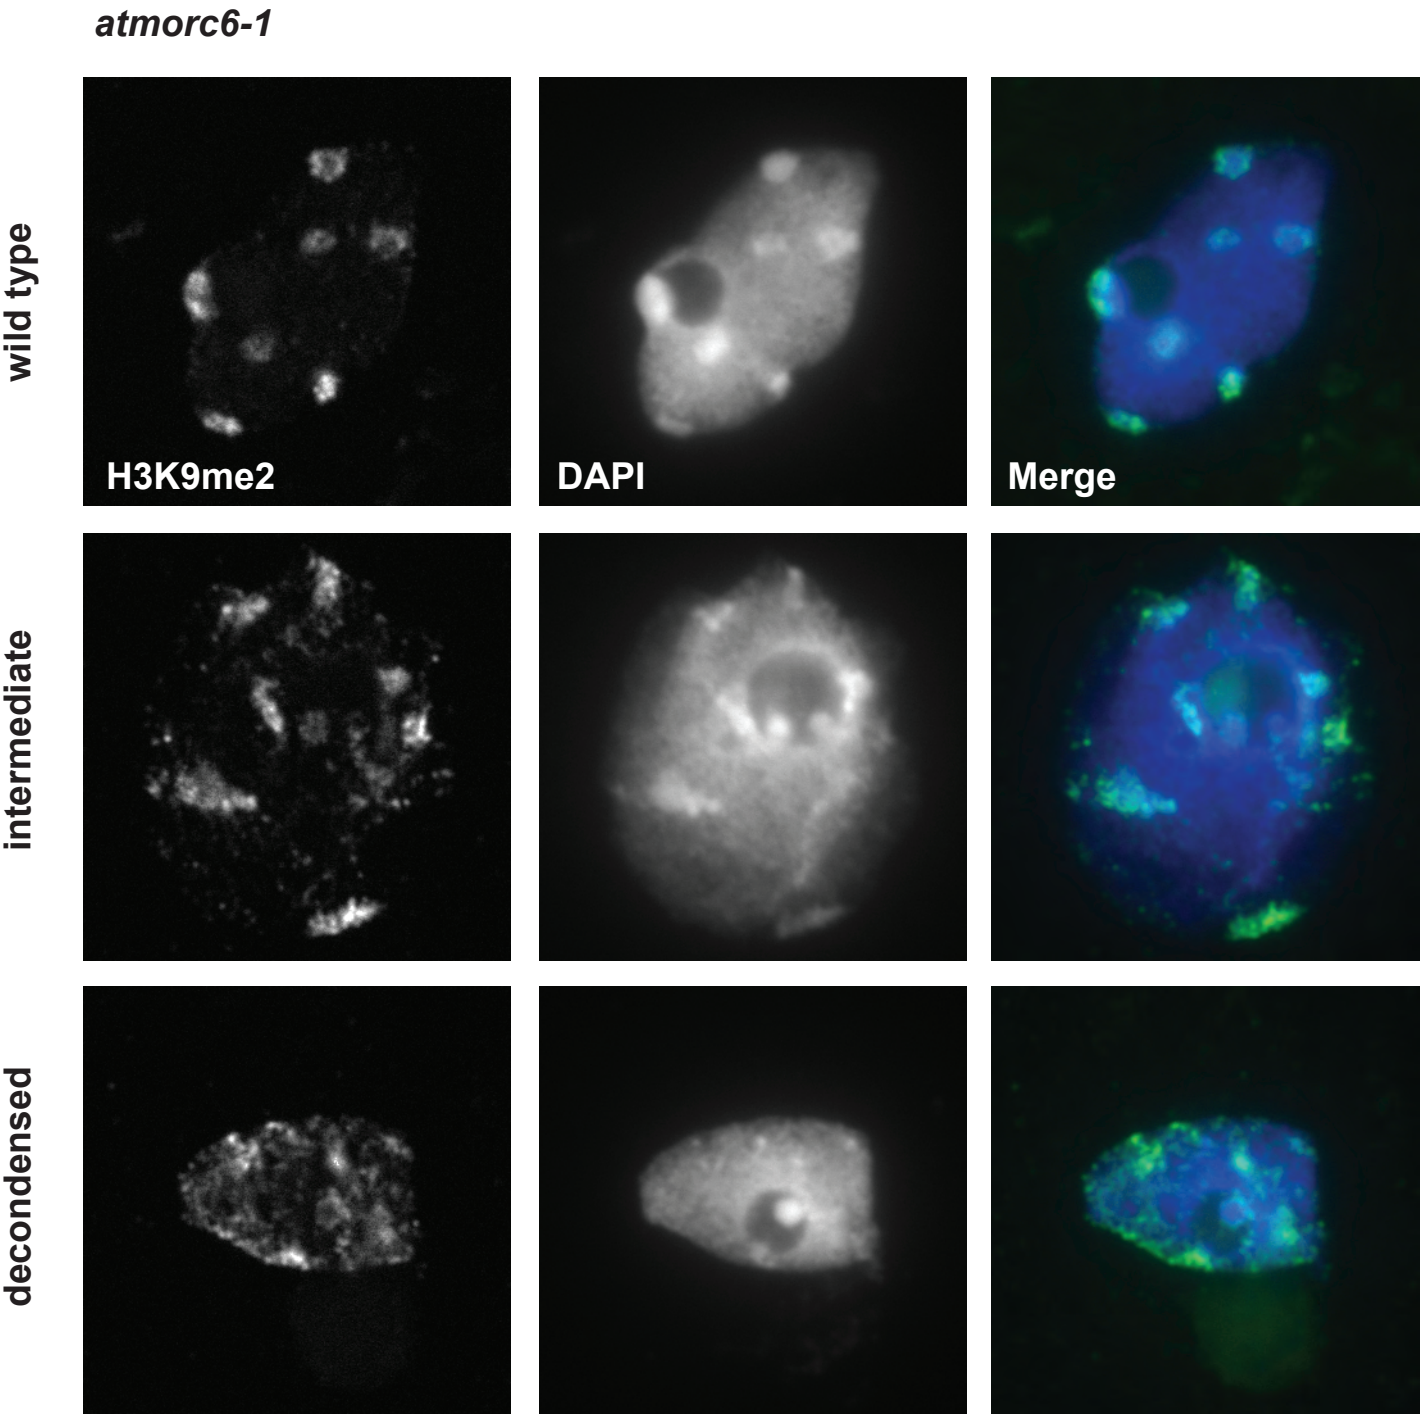

**Fig. S11**

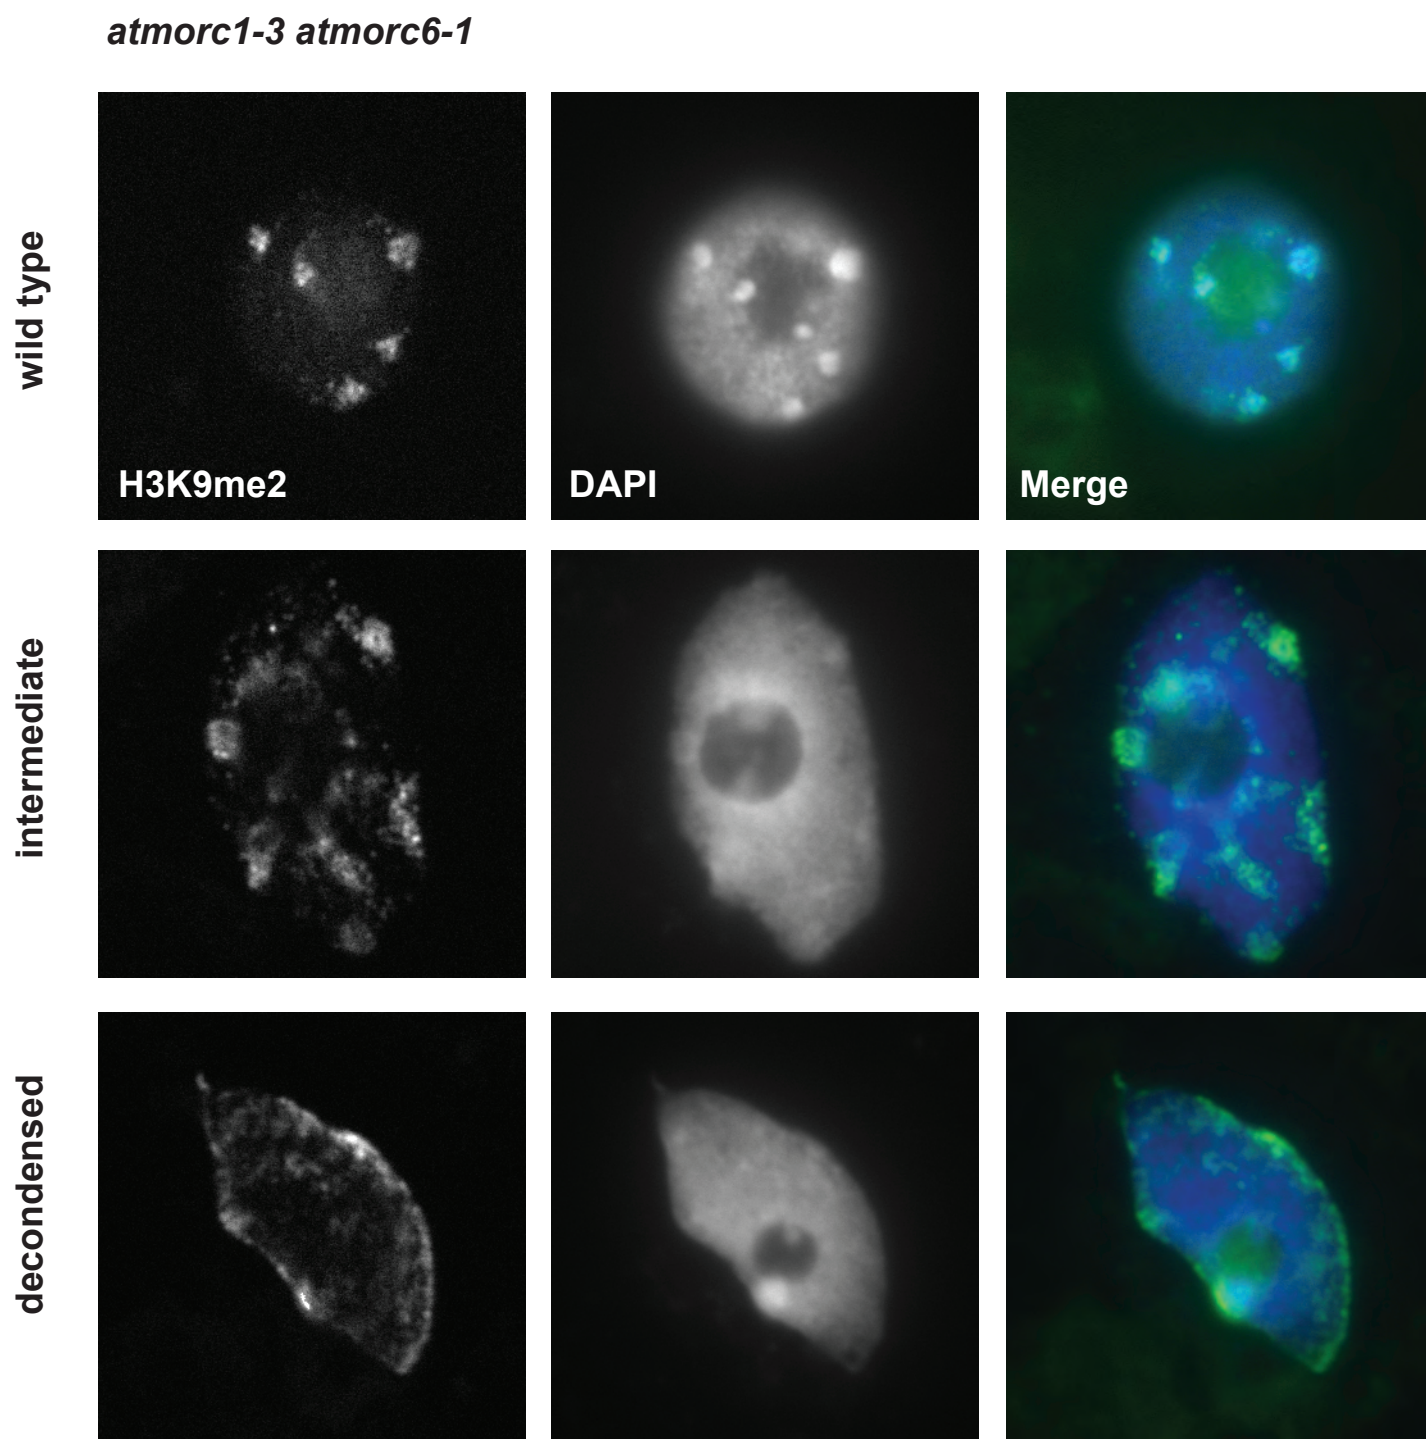

Fig. S12

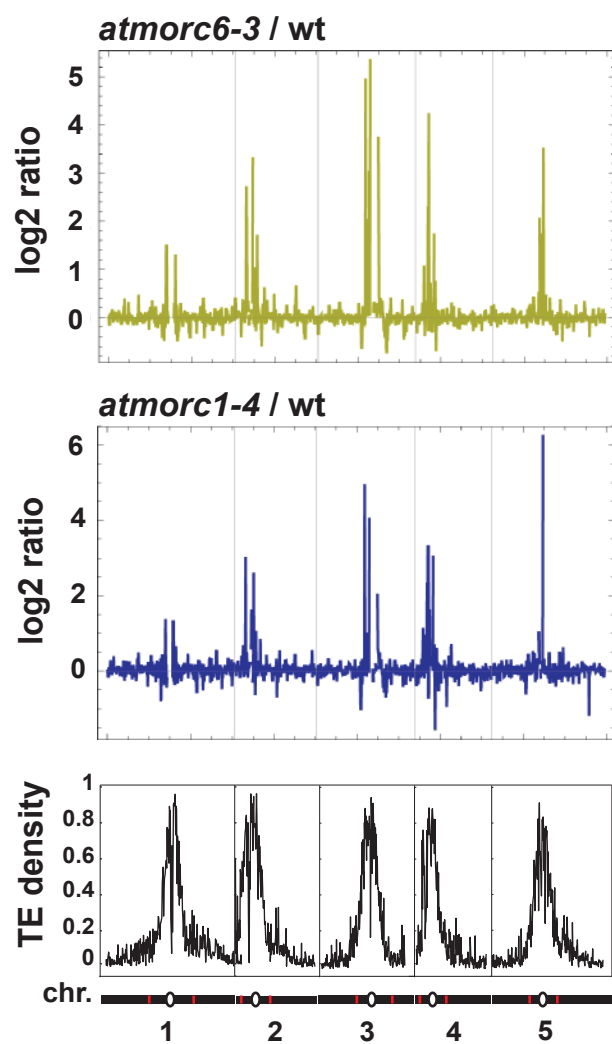

Fig. S13

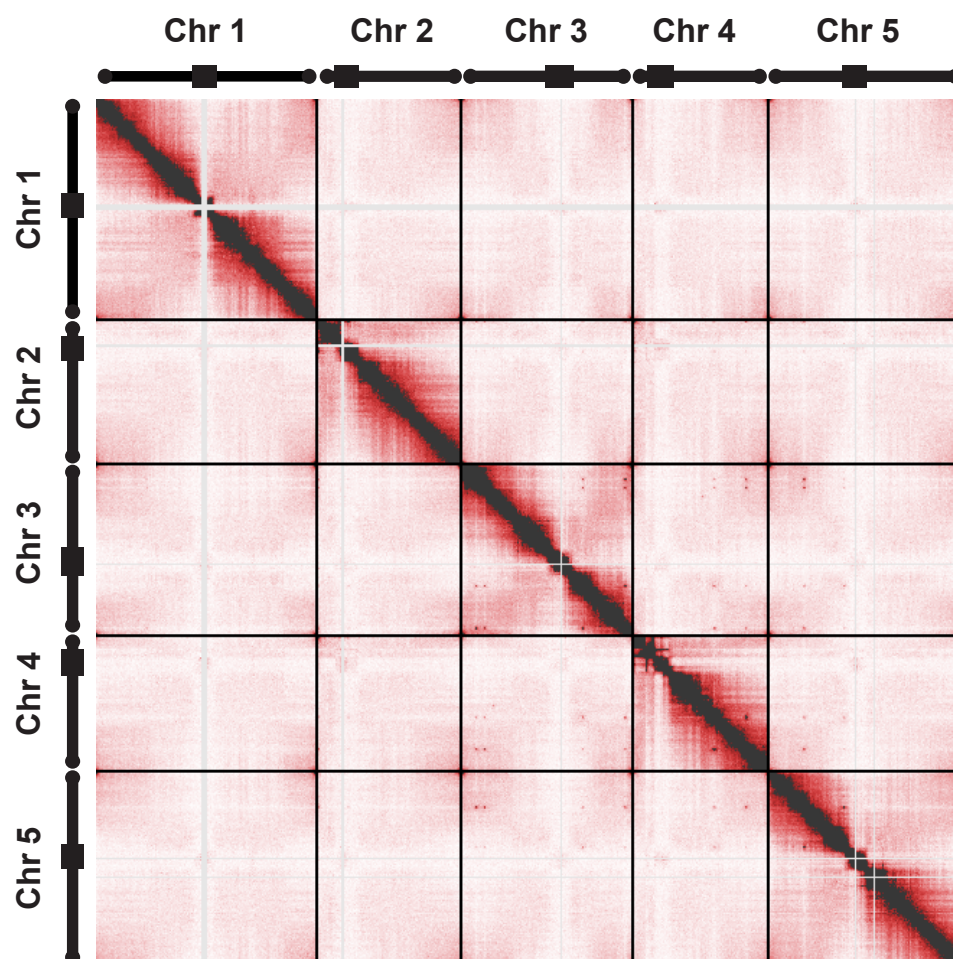

**Fig. S14**

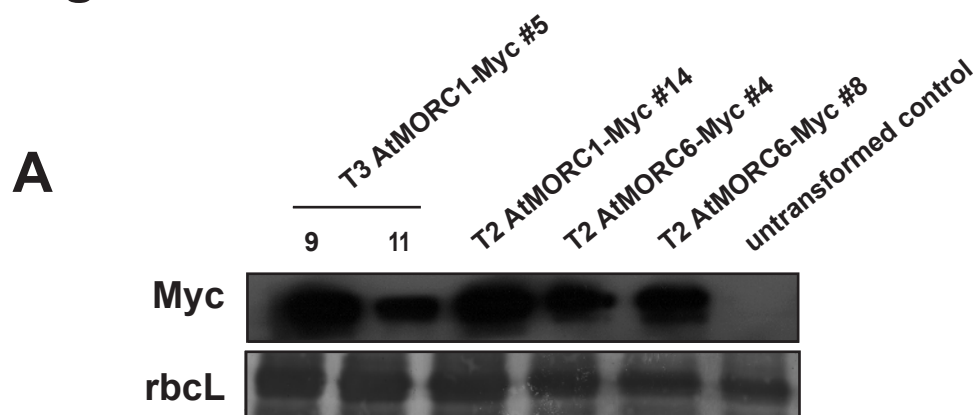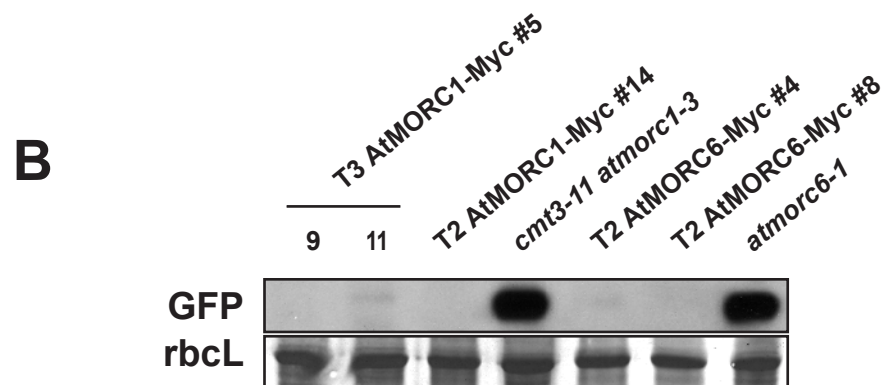

**Fig. S15**

pAtMORC6::AtMORC6-Myc

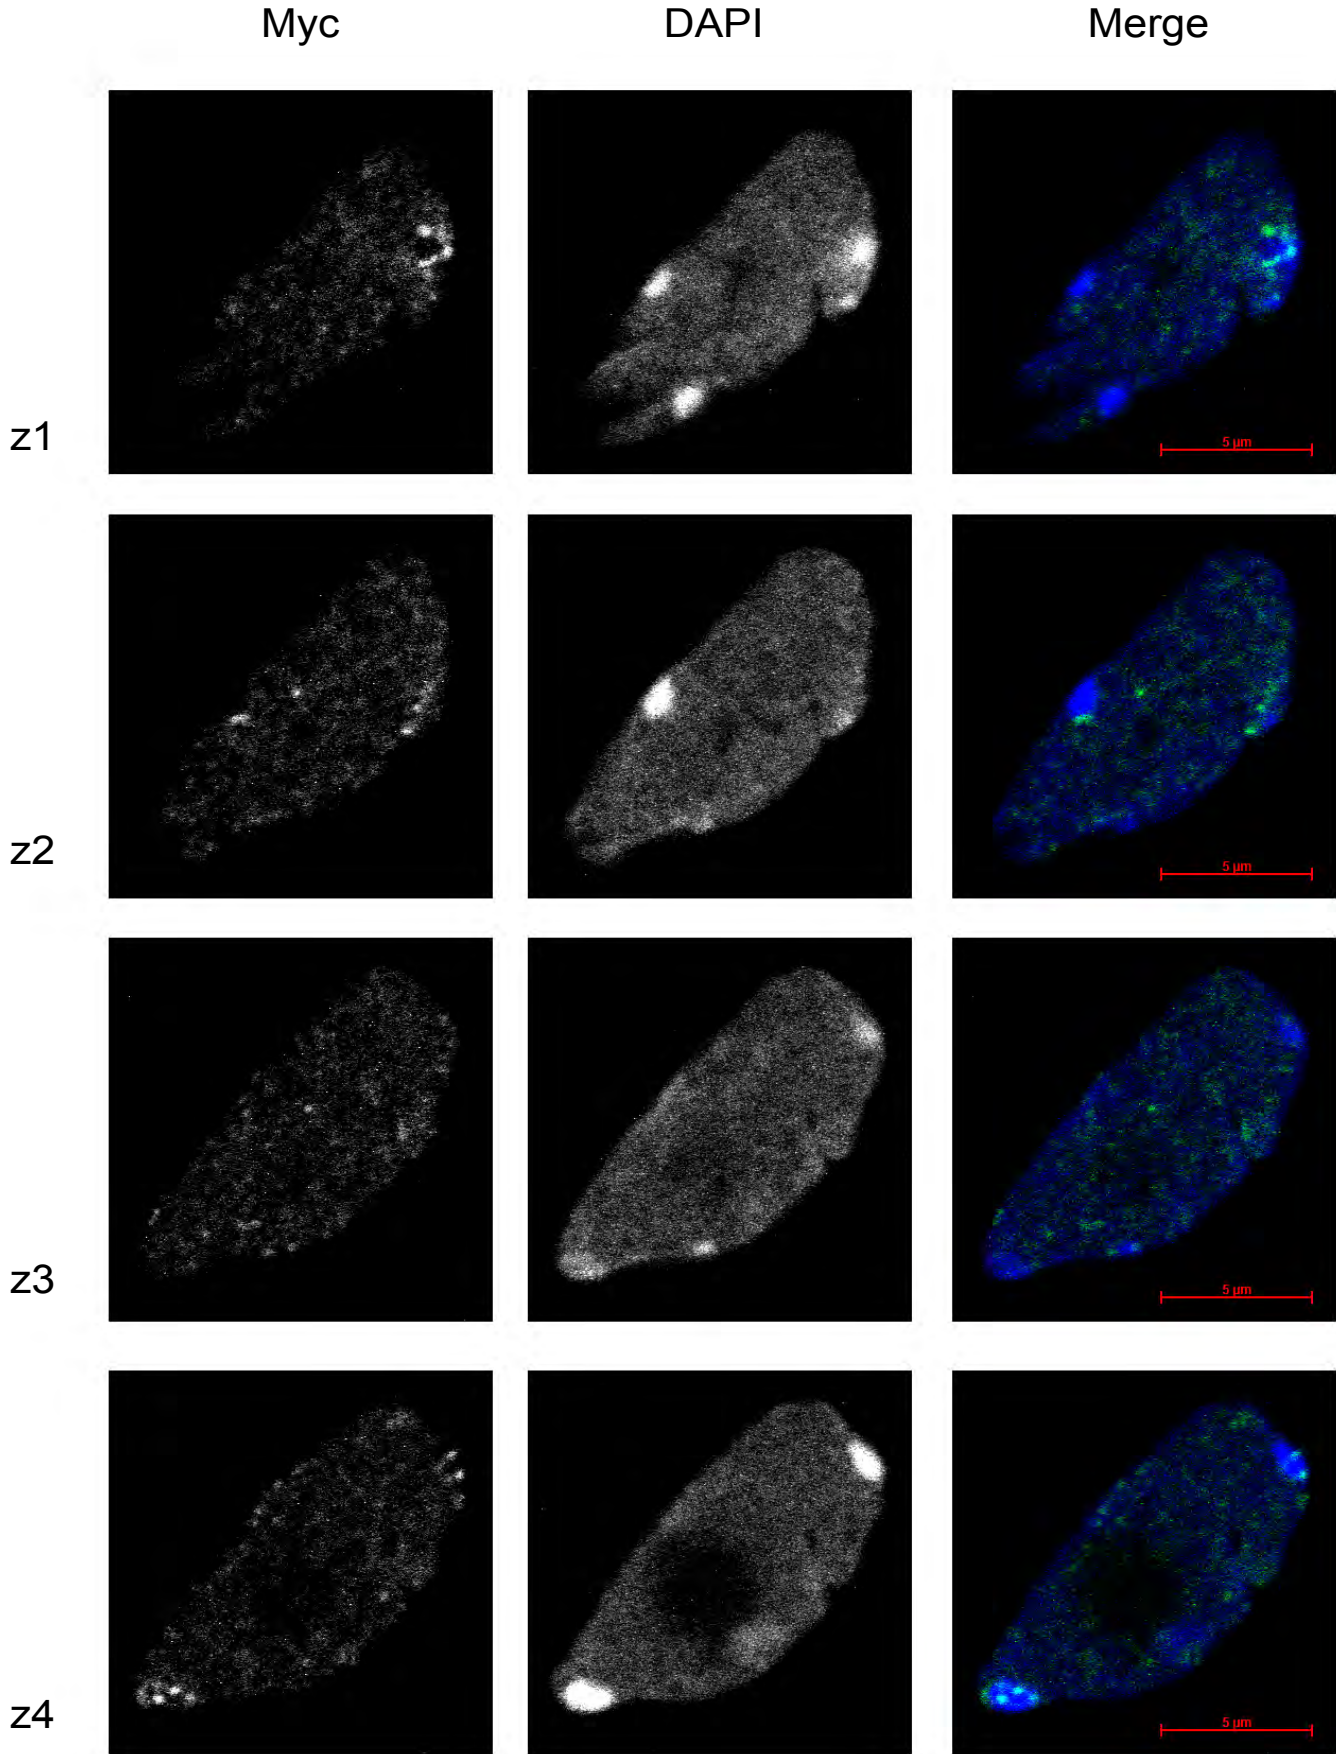

Fig. S15 (continued)

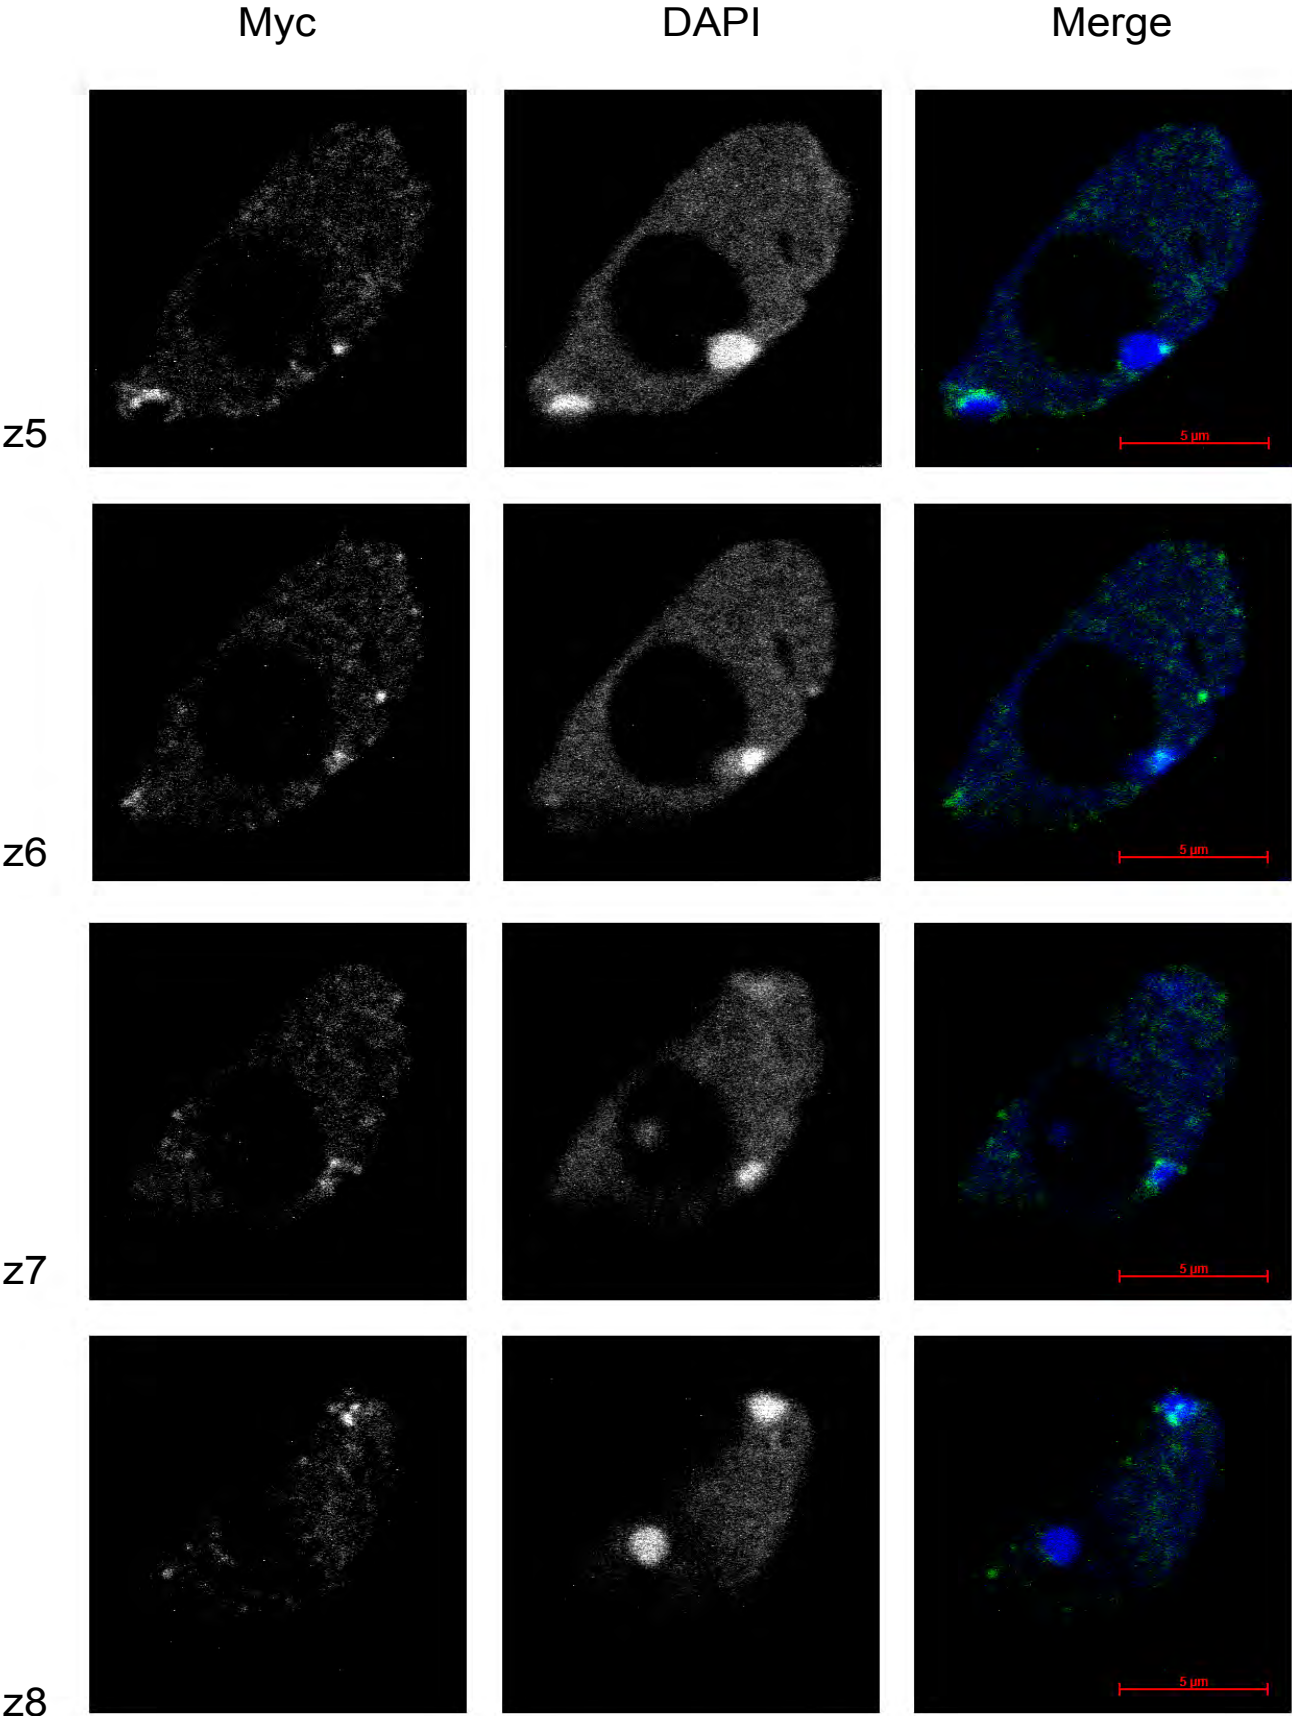

**Table S1: Lists of Transposable elements (TEs) 4-fold upregulated in both EMS and T-DNA *atmorc6* and *atmorc1* mutant alleles.** The TE soloLTR was identified by RT-qPCR. Therefore, it does not appear in Venn diagram shown in Fig. S4b.

| TEs upregulated in <i>atmorc6</i> |             |                      |                            |
|-----------------------------------|-------------|----------------------|----------------------------|
| NAME                              | FAMILY NAME | SUPERFAMILY NAME     | CHROMOSOMAL LOCATION       |
| AT1TE43225                        | ROMANIAT5   | LTR/Copia            | chr1:13,232,205-13,236,935 |
| AT1TE45510                        | ATENSPM6    | DNA/En-Spm           | chr1:13,872,370-13,872,595 |
| AT1TE51360                        | ROMANIAT5   | LTR/Copia            | chr1:15,613,068-15,617,844 |
| AT2TE07145                        | ATCOPIA95   | LTR/Copia            | chr2:1,547,658-1,552,030   |
| AT2TE13060                        | ATCOPIA32   | LTR/Copia            | chr2:2,995,748-2,996,367   |
| AT2TE16220                        | HELITRON2   | RC/Helitron          | chr2:3,749,179-3,756,447   |
| AT2TE18240                        | ATIS112A    | DNA/Harbinger        | chr2:4,343,480-4,344,832   |
| AT2TE28020                        | ATMU1       | DNA/MuDR             | chr2:6,888,343-6,891,692   |
| AT2TE41170                        | ATIS112A    | DNA/Harbinger        | chr2:9,660,885-9,661,799   |
| AT3TE51895                        | ROMANIAT5   | LTR/Copia            | chr3:12,605,745-12,609,307 |
| AT3TE51900                        | ATCOPIA28   | LTR/Copia            | chr3:12,609,702-12,610,774 |
| AT3TE51910                        | VANDAL18NA  | DNA/MuDR             | chr3:12,612,304-12,613,201 |
| AT3TE51930                        | ATGP1       | LTR/Gypsy            | chr3:12,615,787-12,623,418 |
| AT3TE60425                        | ATHILA3     | LTR/Gypsy            | chr3:14,799,085-14,800,505 |
| AT3TE60460                        | ATHILA6A    | LTR/Gypsy            | chr3:14,806,306-14,815,940 |
| AT3TE63540                        | ATHILA2     | LTR/Gypsy            | chr3:15,722,463-15,733,680 |
| AT4TE04415                        | ATIS112A    | DNA/Harbinger        | chr4:860,921-864,078       |
| AT4TE09845                        | ATIS112A    | DNA/Harbinger        | chr4:2,076,980-2,077,351   |
| AT4TE15005                        | ATHILA3     | LTR/Gypsy            | chr4:3,266,370-3,288,501   |
| AT4TE15025                        | ATHILA0_I   | LTR/Gypsy            | chr4:3,273,946-3,285,539   |
| AT4TE15030                        | ATHILA6A    | LTR/Gypsy            | chr4:3,274,431-3,285,232   |
| soloLTR                           | soloLTR     | retroelement soloLTR | chr5:9,871,837-9,872,408   |
| AT5TE39630                        | ATIS112A    | DNA/Harbinger        | chr5:10,901,855-10,903,021 |
| AT5TE47200                        | ATHILA2     | LTR/Gypsy            | chr5:13,334,474-13,345,770 |
| AT5TE48715                        | ATREP15     | RC/Helitron          | chr5:13,705,744-13,706,653 |
| AT5TE48720                        | HELITRONY1E | RC/Helitron          | chr5:13,706,654-13,706,934 |
| TEs upregulated in <i>atmorc1</i> |             |                      |                            |
| NAME                              | FAMILY NAME | SUPERFAMILY NAME     | CHROMOSOMAL LOCATION       |
| AT1TE43225                        | ROMANIAT5   | LTR/Copia            | chr1:13,232,205-13,236,935 |
| AT1TE45510                        | ATENSPM6    | DNA/En-Spm           | chr1:13,872,370-13,872,595 |
| AT1TE51360                        | ROMANIAT5   | LTR/Copia            | chr1:15,613,068-15,617,844 |
| AT2TE13060                        | ATCOPIA32   | LTR/Copia            | chr2:2,995,748-2,996,367   |
| AT2TE18240                        | ATIS112A    | DNA/Harbinger        | chr2:4,343,480-4,344,832   |
| AT2TE28020                        | ATMU1       | DNA/MuDR             | chr2:6,888,343-6,891,692   |
| AT2TE28025                        | ATGP10      | LTR/Gypsy            | chr2:6,891,693-6,892,236   |
| AT3TE51895                        | ROMANIAT5   | LTR/Copia            | chr3:12,605,745-12,609,307 |
| AT3TE51900                        | ATCOPIA28   | LTR/Copia            | chr3:12,609,702-12,610,774 |
| AT3TE60460                        | ATHILA6A    | LTR/Gypsy            | chr3:14,806,306-14,815,940 |
| AT4TE04415                        | ATIS112A    | DNA/Harbinger        | chr4:860,921-864,078       |
| AT4TE09845                        | ATIS112A    | DNA/Harbinger        | chr4:2,076,980-2,077,351   |
| soloLTR                           | soloLTR     | retroelement soloLTR | chr5:9,871,837-9,872,408   |
| AT5TE39630                        | ATIS112A    | DNA/Harbinger        | chr5:10,901,855-10,903,021 |
| AT5TE48715                        | ATREP15     | RC/Helitron          | chr5:13,705,744-13,706,653 |
| AT5TE48720                        | HELITRONY1E | RC/Helitron          | chr5:13,706,654-13,706,934 |

|            |           |         |                            |
|------------|-----------|---------|----------------------------|
| AT5TE48740 | ATLINE1_4 | LINE/L1 | chr5:13,712,007-13,715,840 |
|------------|-----------|---------|----------------------------|

**Table S2: Lists of Protein coding genes 4-fold upregulated in both EMS and T-DNA *atmorc6* and *atmorc1* mutant alleles.** With the exception of genes in italics, all genes in these lists are located in pericentromeric regions and show DNA methylation or H3K9me2 silencing marks.

| Protein coding genes upregulated in <i>atmorc6</i> |                                                                                    |
|----------------------------------------------------|------------------------------------------------------------------------------------|
| NAME                                               | GENE ANNOTATION                                                                    |
| AT1G33840                                          | unknown protein                                                                    |
| AT1G35730                                          | APUM9 (ARABIDOPSIS PUMILIO 9); RNA binding                                         |
| AT1G36675                                          | glycine-rich protein                                                               |
| AT1G53480                                          | unknown protein                                                                    |
| AT1G59930                                          | unknown protein                                                                    |
| AT1G60110                                          | jacalin lectin family protein                                                      |
| AT1G67105                                          | non coding RNA                                                                     |
| AT2G07215                                          | unknown protein                                                                    |
| AT2G07240                                          | Ulp1 protease family protein                                                       |
| AT2G10975                                          | unknown protein                                                                    |
| AT2G13770                                          | unknown protein                                                                    |
| AT2G17690                                          | SDC, F-box family protein                                                          |
| AT3G20340                                          | <i>unknown protein</i>                                                             |
| AT3G29639                                          | unknown protein                                                                    |
| AT3G30842                                          | ATPDR10/PDR10 (PLEIOTROPIC DRUG RESISTANCE 10)                                     |
| AT3G33528                                          | unknown protein                                                                    |
| AT3G42850                                          | galactokinase, putative                                                            |
| AT4G12490                                          | <i>protease inhibitor/seed storage/lipid transfer protein (LTP) family protein</i> |
| AT5G07550                                          | GRP19 (Glycine rich protein 19)                                                    |
| AT5G07560                                          | GRP20 (Glycine rich protein 20); nutrient reservoir                                |
| AT5G15500                                          | <i>ankyrin repeat family protein</i>                                               |
| AT5G35480                                          | unknown protein                                                                    |
| AT5G35490                                          | unknown protein                                                                    |
| AT5G36910                                          | <i>THI2.2 (THIONIN 2.2); toxin receptor binding (THI2.2)</i>                       |
| Protein coding genes upregulated in <i>atmorc1</i> |                                                                                    |
| NAME                                               | GENE ANNOTATION                                                                    |
| AT1G19610                                          | <i>LCR78/PDF1.4 (Low-molecular-weight cysteine-rich 78)</i>                        |
| AT1G26390                                          | <i>FAD-binding domain-containing protein</i>                                       |
| AT1G26410                                          | <i>FAD-binding domain-containing protein</i>                                       |
| AT1G33840                                          | unknown protein                                                                    |
| AT1G35730                                          | APUM9 (ARABIDOPSIS PUMILIO 9)                                                      |
| AT1G36675                                          | glycine-rich protein (AT1G36675)                                                   |
| AT1G47890                                          | <i>disease resistance family protein</i>                                           |
| AT2G07215                                          | unknown protein                                                                    |
| AT2G10975                                          | unknown protein                                                                    |
| AT2G13770                                          | unknown protein                                                                    |
| AT2G17690                                          | SDC, F-box family protein                                                          |
| AT2G17740                                          | <i>DC1 domain-containing protein</i>                                               |
| AT2G45220                                          | <i>pectinesterase family protein</i>                                               |
| AT3G29639                                          | unknown protein                                                                    |
| AT3G30842                                          | ATPDR10/PDR10 (PLEIOTROPIC DRUG RESISTANCE 10)                                     |
| AT3G33528                                          | unknown protein                                                                    |
| AT3G55970                                          | oxidoreductase, 2OG-Fe(II) oxygenase family protein                                |

|           |                                                                                    |
|-----------|------------------------------------------------------------------------------------|
| AT4G12490 | <i>protease inhibitor/seed storage/lipid transfer protein (LTP) family protein</i> |
| AT4G18170 | <i>WRKY28 (WRKY DNA-binding protein 28); transcription factor</i>                  |
| AT5G07550 | GRP19 (Glycine rich protein 19)                                                    |
| AT5G35480 | unknown protein                                                                    |
| AT5G35490 | unknown protein                                                                    |
| AT5G35510 | unknown protein                                                                    |

**Table S3: Lists of Transposable elements (TEs) and protein-coding genes (PCGs) that were 4-fold upregulated in the *atmorc1-3 atmorc6-1* double mutant.** \* defines loci found to be 4-fold upregulated only in the *atmorc1-3 atmorc6-1* double and not in the *atmorc1* or *atmorc6* single mutants. All the other loci have been found to be upregulated in either EMS or T-DNA *atmorc1* and/or *atmorc6* alleles at least in one RNA sequencing dataset.

| TEs upregulated in the <i>atmorc1-3 atmorc6-1</i> double mutant |             |                  |                            |
|-----------------------------------------------------------------|-------------|------------------|----------------------------|
| NAME                                                            | FAMILY NAME | SUPERFAMILY NAME | CHROMOSOMAL LOCATION       |
| AT1TE30845                                                      | HELITRON1   | RC/Helitron      | chr1:9,574,349-9,575,358   |
| AT1TE43225                                                      | ROMANIAT5   | LTR/Copia        | chr1:13,232,205-13,236,935 |
| AT1TE45135                                                      | ATHILA2     | LTR/Gypsy        | chr1:13,872,370-13,872,595 |
| AT1TE45510                                                      | ATENSPM6    | DNA/En-Spm       | chr1:13,872,370-13,872,595 |
| AT1TE53070                                                      | ATCOPIA87   | LTR/Copia        | chr1:16,118,258-16,118,383 |
| AT1TE59745                                                      | ATCOPIA49   | LTR/Copia        | chr1:18,005,845-18,011,038 |
| AT2TE07145                                                      | ATCOPIA95   | LTR/Copia        | chr2:1,547,658-1,552,030   |
| AT2TE08840                                                      | TA11        | LINE/L1          | chr2:1,921,517-1,925,279   |
| AT2TE13060                                                      | ATCOPIA32   | LTR/Copia        | chr2:2,995,748-2,996,367   |
| AT2TE15415                                                      | ATGP10      | LTR/Gypsy        | chr2:3,533,343-3,539,331   |
| AT2TE15880                                                      | ATHILA6A    | LTR/Gypsy        | chr2:3,643,453-3,652,409   |
| AT2TE16220                                                      | HELITRON2   | RC/Helitron      | chr2:3,749,179-3,756,447   |
| AT2TE18240                                                      | ATIS112A    | DNA/Harbinger    | chr2:4,343,480-4,344,832   |
| AT2TE19615                                                      | VANDAL21    | DNA/MuDR         | chr2:4,736,486-4,744,627   |
| AT2TE19625                                                      | ATHILA4C    | LTR/Gypsy        | chr2:4,738,315-4,739,542   |
| AT2TE29450                                                      | ATCOPIA70   | LTR/Copia        | chr2:7,231,166-7,236,206   |
| AT2TE38900                                                      | ATCOPIA76   | LTR/Copia        | chr2:9,194,572-9,198,735   |
| AT2TE38905                                                      | ATGP2N      | LTR/Gypsy        | chr2:9,198,736-9,200,805   |
| AT2TE66360                                                      | ATCOPIA50   | LTR/Copia        | chr2:14,938,850-14,939,092 |
| AT3TE50570                                                      | VANDAL3     | DNA/MuDR         | chr3:12,177,936-12,189,847 |
| AT3TE50595                                                      | ATHILA2     | LTR/Gypsy        | chr3:12,189,865-12,193,865 |
| AT3TE51895                                                      | ROMANIAT5   | LTR/Copia        | chr3:12,605,745-12,609,307 |
| AT3TE51900                                                      | ATCOPIA28   | LTR/Copia        | chr3:12,609,702-12,610,774 |
| AT3TE51910                                                      | VANDAL18NA  | DNA/MuDR         | chr3:12,612,304-12,613,201 |
| AT3TE51930                                                      | ATGP1       | LTR/Gypsy        | chr3:12,615,787-12,623,418 |
| AT3TE60425                                                      | ATHILA3     | LTR/Gypsy        | chr3:14,799,08- 14,800,505 |
| AT3TE60460                                                      | ATHILA6A    | LTR/Gypsy        | chr3:14,806,306-14,815,940 |
| AT3TE63540                                                      | ATHILA2     | LTR/Gypsy        | chr3:15,722,463-15,733,680 |
| AT4TE09845                                                      | ATIS112A    | DNA/Harbinger    | chr4:2,076,980-2,077,351   |
| AT4TE10335                                                      | ATCOPIA58   | LTR/Copia        | chr4:2,198,163-2,203,991   |
| AT4TE15005                                                      | ATHILA3     | LTR/Gypsy        | chr4:3,266,370-3,288,501   |
| AT4TE15025                                                      | ATHILA0_I   | LTR/Gypsy        | chr4:3,273,946-3,285,539   |
| AT4TE15030                                                      | ATHILA6A    | LTR/Gypsy        | chr4:3,274,431-3,285,232   |
| AT4TE16900                                                      | ATHILA      | LTR/Gypsy        | chr4:3,838,635-3,843,992   |
| AT4TE17090                                                      | ATCOPIA41   | LTR/Copia        | chr4:3,909,249-3,910,990   |
| AT4TE17115                                                      | ATHILA6A    | LTR/Gypsy        | chr4:3,915,207-3,916,819   |
| AT4TE20120                                                      | ATENSPM5    | DNA/En-Spm       | chr4:4,830,277-4,836,762   |
| AT4TE25590                                                      | ATCOPIA49   | LTR/Copia        | chr4:6,067,394-6,072,632   |
| AT5TE35950                                                      | HELITRONY1D | RC/Helitron      | chr5:9,871,833-9,872,483   |
| AT5TE39170                                                      | ATGP1       | LTR/Gypsy        | chr5:10,764,247-10,772,507 |
| AT5TE39630                                                      | ATIS112A    | DNA/Harbinger    | chr5:10,901,855-10,903,021 |

| AT5TE43315                                                          | ATHILA                                                                                   | LTR/Gypsy | chr5:12,182,325-12,187,588 |
|---------------------------------------------------------------------|------------------------------------------------------------------------------------------|-----------|----------------------------|
| AT5TE46210                                                          | ATHILA8B                                                                                 | LTR/Gypsy | chr5:13,008,325-13,013,667 |
| AT5TE47200                                                          | ATHILA2                                                                                  | LTR/Gypsy | chr5:13,334,474-13,345,770 |
| PCGs upregulated in <i>in the atmorc1-3 atmorc6-1 double mutant</i> |                                                                                          |           |                            |
| NAME                                                                | GENE ANNOTATION                                                                          |           |                            |
| AT3G20710                                                           | F-box protein-related                                                                    |           |                            |
| AT4G05370                                                           | unknown protein                                                                          |           |                            |
| AT3G13220                                                           | ABC transporter family protein                                                           |           |                            |
| AT3G15440                                                           | unknown protein                                                                          |           |                            |
| AT3G22860                                                           | TIF3C2 (eukaryotic translation initiation factor 3 subunit C2)                           |           |                            |
| AT5G29560                                                           | Ca <sup>2+</sup> -binding EF hand family protein                                         |           |                            |
| AT1G45063                                                           | copper ion binding / electron carrier                                                    |           |                            |
| AT3G44460                                                           | DPBF2 (BASIC LEUCINE ZIPPER TRANSCRIPTION FACTOR 67)                                     |           |                            |
| AT3G30842                                                           | ATPDR10/PDR10 (PLEIOTROPIC DRUG RESISTANCE 10)                                           |           |                            |
| AT1G27570                                                           | phosphatidylinositol 3- and 4-kinase family protein                                      |           |                            |
| AT2G17690                                                           | F-box family protein                                                                     |           |                            |
| AT3G29639                                                           | unknown protein                                                                          |           |                            |
| AT2G04050                                                           | MATE efflux family protein                                                               |           |                            |
| AT5G60260                                                           | unknown protein                                                                          |           |                            |
| AT4G05380                                                           | AAA-type ATPase family protein                                                           |           |                            |
| AT1G33840                                                           | unknown protein                                                                          |           |                            |
| AT2G10975                                                           | unknown protein                                                                          |           |                            |
| AT5G18840                                                           | sugar transporter, putative                                                              |           |                            |
| AT1G36675                                                           | glycine-rich protein                                                                     |           |                            |
| AT1G35730                                                           | APUM9 (ARABIDOPSIS PUMILIO 9); RNA binding (APUM9)                                       |           |                            |
| AT3G01345                                                           | unknown protein                                                                          |           |                            |
| AT1G15150                                                           | MATE efflux family protein                                                               |           |                            |
| AT4G36850                                                           | PQ-loop repeat family protein / transmembrane family protein                             |           |                            |
| AT1G27565                                                           | unknown protein                                                                          |           |                            |
| AT2G07213                                                           | other_rna                                                                                |           |                            |
| AT5G23020                                                           | MAM-L (METHYLTHIOALKYMALATE SYNTHASE-LIKE); 2-isopropylmalate synthase                   |           |                            |
| AT5G45095                                                           | unknown protein                                                                          |           |                            |
| AT4G20820*                                                          | FAD-binding domain-containing protein                                                    |           |                            |
| AT2G07215                                                           | unknown protein                                                                          |           |                            |
| AT3G14380                                                           | integral membrane family protein                                                         |           |                            |
| AT3G47340                                                           | ASN1 (DARK INDUCIBLE 6)                                                                  |           |                            |
| AT5G07700*                                                          | MYB76 (myb domain protein 76); DNA binding / transcription factor                        |           |                            |
| AT5G41080                                                           | glycerophosphoryl diester phosphodiesterase family protein                               |           |                            |
| AT3G33528                                                           | unknown protein                                                                          |           |                            |
| AT3G09450                                                           | unknown protein                                                                          |           |                            |
| AT5G38386                                                           | F-box family protein                                                                     |           |                            |
| AT2G18193                                                           | AAA-type ATPase family protein                                                           |           |                            |
| AT5G36910                                                           | THI2.2 (THIONIN 2.2); toxin receptor binding (THI2.2)                                    |           |                            |
| AT3G44990*                                                          | XTR8 (xyloglucan:xyloglucosyl transferase 8); hydrolase, acting on glycosyl bonds (XTR8) |           |                            |
| AT3G01600                                                           | ANAC044 (Arabidopsis NAC domain containing protein 44); transcription factor             |           |                            |
| AT1G07450*                                                          | tropinone reductase, putative / tropine dehydrogenase, putative                          |           |                            |
| AT4G15680                                                           | glutaredoxin family protein                                                              |           |                            |

| <b>Table S4: Sequences of primers used in this study</b> |                           |                                          |
|----------------------------------------------------------|---------------------------|------------------------------------------|
| <b>T-DNA genotyping</b>                                  |                           |                                          |
| JP9339                                                   | atmorc6-3 LP              | GGAAAGCTGGAAGCTATAATGATG                 |
| JP9340                                                   | atmorc6-3 RP              | GATGACATCTGCCCCAAGTCTC                   |
| JP7707                                                   | GABI-KAT LB O8409         | ATATTGACCATCATACTCATTGC                  |
| JP8938                                                   | atmorc1-4 LP              | CGTATCTCAGCCGCTAACTTG                    |
| JP8939                                                   | atmorc1-4 RP              | AAGCAGCTGCAGTGGATTATG                    |
| JP2207                                                   | LB3 SAIL T-DNA            | TAGCATCTGAATTTTATAACCAATCTCGATACAC       |
| JP8509                                                   | drm2-2 LP                 | AGATCGCTTCCAGAGTTAGCC                    |
| JP8510                                                   | drm2-2 RP                 | TTGTCGCAAAAAGCAAAAGAG                    |
| JP2922                                                   | cmt3-11 LP                | TAACGGAAGGATGCCAGATT                     |
| JP2923                                                   | cmt3-11 RP                | CAAGAAATGGGCTGTTGACAT                    |
| JP2410                                                   | LBA1 SALK T-DNA           | TGGTTCACGTAGTGGGCCATCG                   |
| <b>RT-qPCR</b>                                           |                           |                                          |
| JP2452                                                   | ACTIN 7 LP                | TCGTGGTGGTGAGTTTGTTAC                    |
| JP2453                                                   | ACTIN 7 RP                | CAGCATCATCACAAGCATCC                     |
| JP3395                                                   | SDC LP                    | AATGTAAGTTGTAAACCATTTGAACGTGACC          |
| JP3396                                                   | SDC RP                    | CAGGCATCCGTAGAACTCATGAGC                 |
| JP9642                                                   | ROMANIAT5 LP              | GTATCCTTTGGCCCGGTATT                     |
| JP9643                                                   | ROMANIAT5 RP              | GCCTCTTCGAAATGCCATAA                     |
| JP9055                                                   | ATCOPIA28 LP              | AGTCCTTTTGGTTGCTGAACA                    |
| JP9056                                                   | ATCOPIA28 RP              | CCGGATGTAGCAACATTCAT                     |
| JP9640                                                   | soloLTR LP                | AACTAACGTCATTACATACACATCTTG              |
| JP9641                                                   | soloLTR RP                | AATTAGGATCTTGTTTGCCAGCTA                 |
| JP9057                                                   | ATMU1 LP                  | TAATTTGGCTGACGGAATCAC                    |
| JP9058                                                   | ATMU1 RP                  | ATTTGGGGGAAAACAAATGAG                    |
| JP9646                                                   | atmorc6-3 LP              | CATGTGCACCCTATGTTTCCTT                   |
| JP9647                                                   | atmorc6-3 RP              | ATCCCTTGGATTTGTGGTTTT                    |
| JP9680                                                   | atmorc1-4 LP              | ATCAAGGAGGCCCTTAACTT                     |
| JP9681                                                   | atmorc1-4 RP              | TGTGACAGTGATTTTGCCAGT                    |
| <b>BS-sequencing</b>                                     |                           |                                          |
| JP6349                                                   | SDC BSPCR LP              | GAAAAAGTTGGAATGGGTTTGGAGAGTTTAA          |
| JP6350                                                   | SDC BSPCR RP              | CAACAAACCCTAATATATTTTATATTAAAC           |
| JP9775                                                   | ROMANIAT5 BSPCR LP        | GTAAGTGGATTAGTTATTTAAAGAGAGTT            |
| JP9776                                                   | ROMANIAT5 BSPCR RP        | ATAAATAAACATCATCTACATCTTATAA             |
| JP9120                                                   | ATCOPIA28 BSPCR LP        | TATTTATTTYGTTTCATTTGGATTAGTTTT           |
| JP9121                                                   | ATCOPIA28 BSPCR RP        | ACRATATCAAATAATTATCATCATCTTAA            |
| JP9377                                                   | soloLTR BSPCR LP          | GATATAAAGGAATGGTTAGATAATATGYGATT         |
| JP9378                                                   | soloLTR BSPCR RP          | CRATATAACTCAAATTTATATTACTCTTAA           |
| JP9177                                                   | ATMU1 BSPCR LP            | TTATGAATTAGTTAGTTATAGTTTGTATT            |
| JP9178                                                   | ATMU1 BSPCR RP            | ATTCCTCRTCTTCTACAACATCATTTAA             |
| <b>Cloning</b>                                           |                           |                                          |
| JP5275                                                   | PstI SDCpro fwd           | GTAAGTGCAGTGATGCTCTAACAATTCTTCCACAAGACC  |
| JP5276                                                   | PstI SDCpro rev           | GAAAGTGCAGTTCTCTCCCTGTTTTGCTACTATTG      |
| JP5235                                                   | HindIII-NLS-eGFP FWD      | TGGCAAGCTTATGGCTCCAAAGAAGAAGAGAAAGGTCATG |
| JP5236                                                   | HindIII 35Sterminator REV | TAGCAAGCTTCTCTCAACACATGAGCGAAACCCTATAAG  |
| JP8644                                                   | ATMORC1 Ctertag LP        | CACCGTTGATTTGGTTTTGTCTGGTC               |
| JP8645                                                   | ATMORC1 Ctertag RP        | AACTTGTTGCATCTCCTTCTTC                   |
| JP8646                                                   | ATMORC6 Ctertag LP        | CACCAGTATGATGTGAGGTTAGTGAG               |

|        |                    |                      |
|--------|--------------------|----------------------|
| JP8647 | ATMORC6_Ctertag_RP | CGTATTACATTCTTCTGTGC |
|--------|--------------------|----------------------|

## References:

1. J. A. Law, S. E. Jacobsen, *Nat Rev Genet* **11**, 204 (2010).
2. J. P. Jackson, A. M. Lindroth, X. Cao, S. E. Jacobsen, *Nature* **416**, 556 (2002).
3. F. Malagnac, L. Bartee, J. Bender, *EMBO J* **21**, 6842 (2002).
4. X. Zhang *et al.*, *Cell* **126**, 1189 (2006).
5. I. R. Henderson, S. E. Jacobsen, *Genes Dev* **22**, 1597 (2008).
6. H. G. Kang, J. C. Kuhl, P. Kachroo, D. F. Klessig, *Cell Host Microbe* **3**, 48 (2008).
7. H. G. Kang *et al.*, *The Plant cell* **22**, 918 (2010).
8. Z. Wang, M. Gerstein, M. Snyder, *Nat Rev Genet* **10**, 57 (2009).
9. S. J. Cokus *et al.*, *Nature* **452**, 215 (2008).
10. M. L. Watson *et al.*, *Proc Natl Acad Sci U S A* **95**, 14361 (1998).
11. N. Inoue *et al.*, *Hum Mol Genet* **8**, 1201 (1999).
12. L. M. Iyer, S. Abhiman, L. Aravind, *Biology direct* **3**, 8 (2008).
13. P. Fransz, J. H. De Jong, M. Lysak, M. R. Castiglione, I. Schubert, *Proc Natl Acad Sci U S A* **99**, 14584 (2002).
14. E. Lieberman-Aiden *et al.*, *Science* **326**, 289 (2009).
15. P. Amedeo, Y. Habu, K. Afsar, O. Mittelsten Scheid, J. Paszkowski, *Nature* **405**, 203 (2000).
16. A. V. Probst, P. F. Fransz, J. Paszkowski, O. Mittelsten Scheid, *Plant J* **33**, 743 (2003).
17. V. J. Simpson, T. E. Johnson, R. F. Hammen, *Nucleic Acids Res* **14**, 6711 (1986).
18. S. Kennedy, D. Wang, G. Ruvkun, *Nature* **427**, 645 (2004).
19. H. Tabara *et al.*, *Cell* **99**, 123 (1999).
20. M. A. Carmell *et al.*, *Dev Cell* **12**, 503 (2007).
21. D. Bourc'his, T. H. Bestor, *Nature* **431**, 96 (2004).
22. A. A. Aravin *et al.*, *Mol Cell* **31**, 785 (2008).
23. M. W. Kankel *et al.*, *Genetics* **163**, 1109 (2003).
24. N. Kleinboelting, G. Huep, A. Kloetgen, P. Viehoveer, B. Weisshaar, *Nucleic Acids Res* **40**, D1211 (2012).
25. S. J. Clough, A. F. Bent, *Plant J* **16**, 735 (1998).
26. J. A. Law, A. A. Vashisht, J. A. Wohlschlegel, S. E. Jacobsen, *PLoS Genet* **7**, e1002195 (2011).
27. M. V. Greenberg *et al.*, *Epigenetics* **6**, 344 (2011).
28. B. Langmead, C. Trapnell, M. Pop, S. L. Salzberg, *Genome Biol* **10**, R25 (2009).
29. A. Mortazavi, B. A. Williams, K. McCue, L. Schaeffer, B. Wold, *Nat Methods* **5**, 621 (2008).
30. Y. Benjamini, Hochberg, Y., *Journal of the Royal Statistical Society Series B* **57: 12.**, (1995).
31. P. Y. Chen, S. J. Cokus, M. Pellegrini, *BMC Bioinformatics* **11**, 203 (2010).
32. J. Lee *et al.*, *Plant Cell* **19**, 731 (2007).
33. C. Lu, B. C. Meyers, P. J. Green, *Methods* **43**, 110 (2007).
34. Y. Zhang *et al.*, *Cell* **148**, 908 (2012).
35. W. J. Soppe *et al.*, *EMBO J* **21**, 6549 (2002).
36. J. K. Kim *et al.*, *Science* **308**, 1164 (2005).
37. R. S. Kamath *et al.*, *Nature* **421**, 231 (2003).
38. Y. Y. Polosina, C. G. Cupples, *Mutation research* **705**, 228 (2010).

- 39. Y. Mimura, K. Takahashi, K. Kawata, T. Akazawa, N. Inoue, *J Cell Sci* **123**, 2014 (2010).
- 40. T. Hirano, *Genes Dev* **16**, 399 (2002).
- 41. M. E. Blewitt *et al.*, *Nat Genet* **40**, 663 (2008).
- 42. I. Ausin, T. C. Mockler, J. Chory, S. E. Jacobsen, *Nat Struct Mol Biol* **16**, 1325 (2009).
- 43. T. Kanno *et al.*, *Nat Genet* **40**, 670 (2008).
- 44. G. Bohmdorfer *et al.*, *Plant J* **67**, 420 (2011).
